# Supplementary material for: Convergence of Hypoxia and TGFβ Pathways on Cell Cycle Regulation in Human Hematopoietic Stem/Progenitor Cells
Source: PubMed Central journal article supplement (PMC3970968; doi:10.1371/journal.pone.0093494), 2014-03-31
Supplement: pone.0093494.s001.pdf [file pone.0093494.s001.pdf]

**Supplemental File S1:**  
**Supplemental data for the manuscript**

**Title: Convergence of hypoxia and TGF $\beta$   
pathways on cell cycle regulation in human  
hematopoietic stem/progenitor cells**

Albertus T.J. Wierenga<sup>1,2</sup>, Edo Vellenga<sup>1</sup> and Jan Jacob Schuringa<sup>1</sup>.

<sup>1</sup>Department of Experimental Hematology, <sup>2</sup>Department of Laboratory Medicine,  
University Medical Center Groningen, University of Groningen, Hanzeplein 1,  
9700 RB, Groningen, The Netherlands.

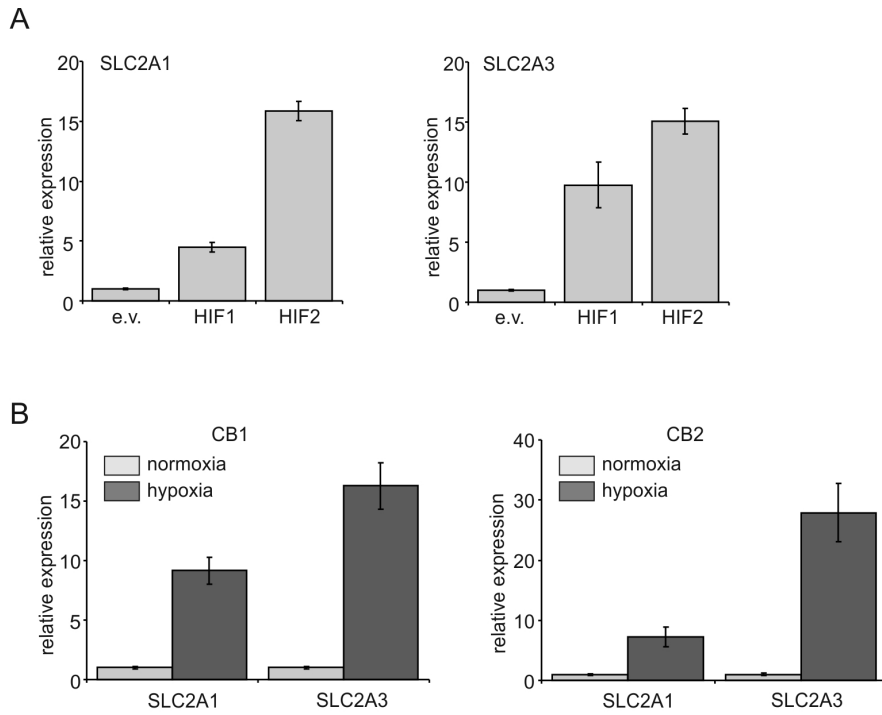

**Figure S1. Verification of HIF1, HIF2 and hypoxia target genes.** **A.** CB CD34<sup>+</sup> cells were transduced with the indicated overexpression vectors at normoxia. Cells were harvested 24 hours after transduction and Q-RT-PCR was performed for SLC2A1 and SLC2A3. (e.v.= empty vector). **B.** CB CD34<sup>+</sup> cells were cultured for 24 hours at normoxia and hypoxia, after which Q-RT-PCR was performed for SLC2A1 and SLC2A3. Two independent cord blood batches are shown. Error bars indicate standard deviation of PCR performed in triplicate.

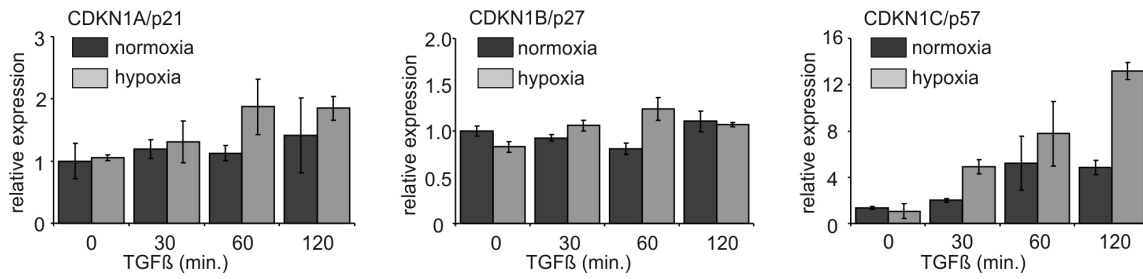

**Figure S2. CDKN1A, CDKN1B and CDKN1C gene induction by TGFβ and hypoxia.** CB CD34<sup>+</sup> cells were cultured under normoxic and hypoxic conditions for 24 hours and stimulated for different times with 1 ng/ml TGFβ where after Q-RT-PCR was performed for CDKN1A/p21, CDKN1B/p27 and CDKN1C/p57. Error bars indicate standard deviation of PCR performed in triplicate.

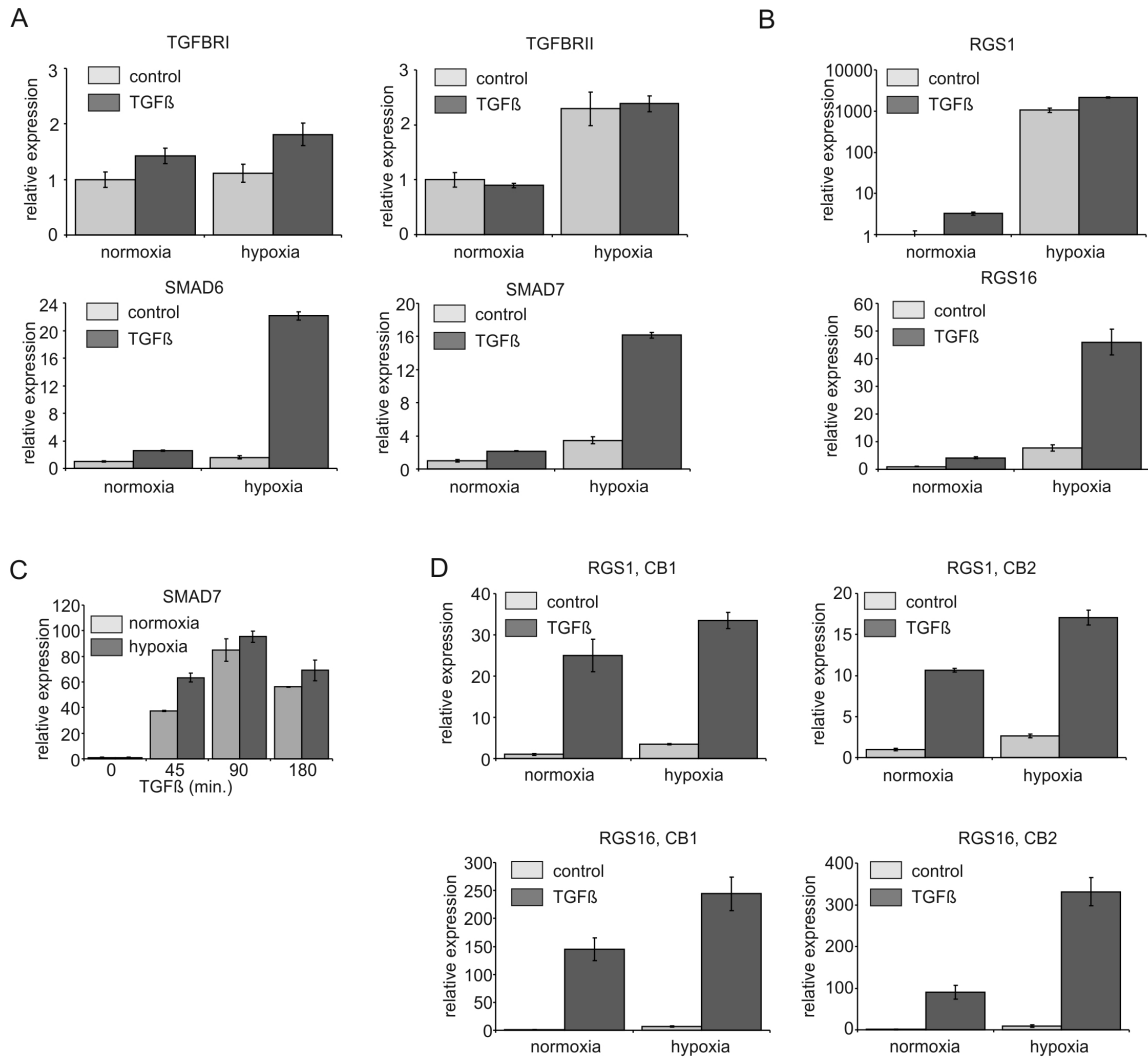

**Figure S3. Hypoxia sensitizes cells for TGFβ signaling.**

**A.** OCI-AML3 cells were cultured for 24 hours under normoxic and hypoxic conditions, treated with TGFβ (1 ng/ml) for 3 hours and Q-RT-PCR was performed. **B.** OCI-AML3 cells were treated as in A, Q-RT-PCR was performed for RGS1 and RGS16. **C.** Q-RT-PCR analysis on CB CD34<sup>+</sup> cells which were cultured under normoxic and hypoxic conditions and treated with 1 ng/ml TGFβ for different timepoints. **D.** Same experiments as in B with CB CD34<sup>+</sup> cells. Two independent cord blood batches were used (CB1 and CB2). Error bars indicate the standard deviation of the PCR performed in triplicate.

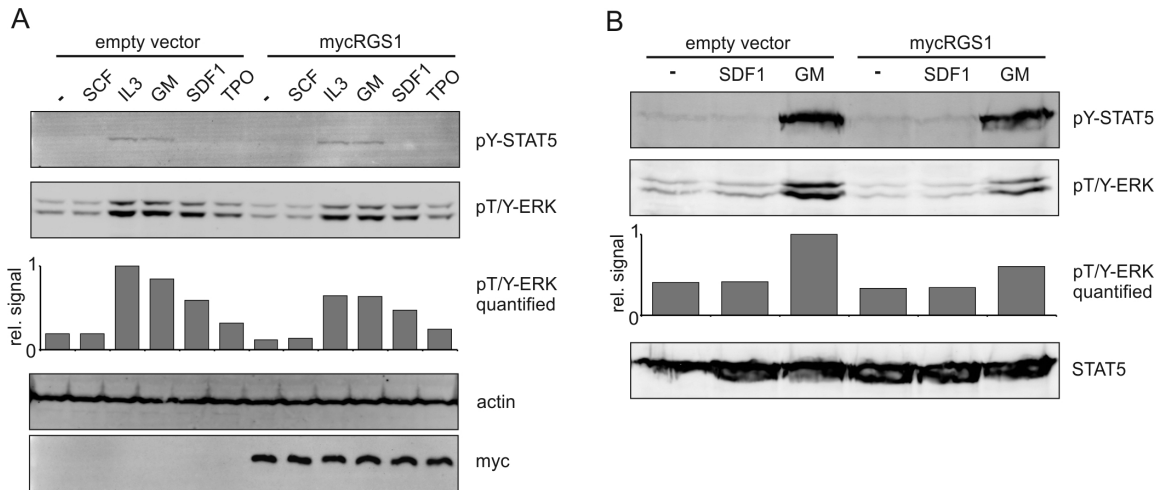

**Figure S4. Reduced ERK signaling upon overexpression of RGS1**

**A.** Western blot of OCI-AML3 cells transduced with empty vector or vector expressing mycRGS1 that were stimulated with different cytokines (20 ng/ml each) for 10 minutes. Equal loading was confirmed by blotting against actin. **B.** UT7-GM cells, overnight deprived from GM-CSF, were stimulated with SDF1 or GM-CSF (20 ng/ml, 10 minutes). Western blot was performed using the indicated antibodies. Total STAT5 probing shows equal gel loading. Band intensities for phospho-ERK1/2 were measured and plotted as relative signal.
