# Supplementary material for: Convergence of Hypoxia and TGFβ Pathways on Cell Cycle Regulation in Human Hematopoietic Stem/Progenitor Cells
Source: PLoS One. 2014 Mar 31;9(3):e93494. doi: 10.1371/journal.pone.0093494 (PMC3970968; doi:10.1371/journal.pone.0093494)
Supplement: Table S2 — Transcriptome data. (XLS) [file pone.0093494.s003.xls]

## Sheet: all data
geneSymbol	probeId	refSeq	entrez	fold HIF1	fold HIF2	fold hypoxia
DEC1	3830482	NM_017418	50514	0.924326	1.02528	1.00393
A1BG	2570615	NM_130786	1	1.00436	1.23395	0.742593
A1BG	6370619	NM_130786	1	0.572497	0.591863	0.982492
A1CF	2650615	NM_014576	29974	0.786636	1.08339	1.28381
A2M	2370438	NM_000014	2	0.783999	0.672266	1.03536
A2ML1	4050154	NM_144670	144568	0.438926	0.91246	1.09661
A4GALT	3610072	NM_017436	53947	0.777762	0.897506	1.15409
AAAS	60689	NM_015665	8086	0.791296	1.77095	0.714418
AACS	1580504	NM_023928	65985	0.903336	1.00797	1.04163
AADAC	6200619	NM_001086	13	1.15153	1.05718	0.744937
AADACL4	2600309	NM_001013630	343066	0.703754	0.697819	0.77892
AADAT	1110326	NM_182662	51166	1.32998	1.36897	0.878595
AADAT	520039	NM_016228	51166	1.21019	1.04315	1.18623
AADAT	6270181	NM_182662	51166	0.581484	0.616787	1.36565
AAK1	6860170	NM_014911	22848	0.915091	0.817606	0.95349
AAK1	1170332	NM_014911	22848	0.599238	1.54604	0.758266
AAMP	4610048	NM_001087	14	1.25908	2.20364	0.826505
AANAT	1070703	NM_001088	15	0.86787	0.981529	0.816974
AARS	290603	NM_001605	16	0.869685	0.709229	1.34578
AARSD1	60154	NM_025267	80755	0.876738	0.693199	0.96873
AASDH	4150561	NM_181806	132949	0.909825	0.71984	1.13563
AASDHPPT	6060767	NM_015423	60496	1.02569	0.834172	0.839154
AASDHPPT	7040717	NM_015423	60496	1	0.502063	0.766147
AASS	1500465	NM_005763	10157	0.91205	0.971576	0.946395
AASS	60280	NM_005763	10157	0.843409	0.704267	1.1996
AATF	6020372	NM_012138	26574	0.903445	1.66499	0.781582
AATK	5550132	NM_001080395	9625	1.18197	1.24075	1.13705
ABAT	1230592	NM_000663	18	0.945895	1.64778	0.948614
ABAT	6580291	NM_000663	18	0.935702	1.24536	0.823508
ABAT	1110025	NM_020686	18	0.827652	0.658676	0.549353
ABCA1	4060358	NM_005502	19	1.51029	1.46745	1.45324
ABCA10	7550128	NM_080282	10349	0.862233	0.988824	0.849973
ABCA10	3190541	NM_080282	10349	0.674303	0.687178	0.710005
ABCA11P	2320403	NR_002451	79963	0.988956	1.12624	1.02326
ABCA12	4570152	NM_173076	26154	0.705396	0.404993	1.69511
ABCA13	1780537	NM_152701	154664	0.968106	0.370774	1.39256
ABCA2	2320243	NM_212533	20	0.515747	0.528253	0.97368
ABCA3	430402	NM_001089	21	1.14083	0.803802	1.03322
ABCA4	6650504	NM_000350	24	1.15713	0.907896	0.940855
ABCA5	3450278	NM_172232	23461	1.50228	2.53663	1.19214
ABCA5	7650253	NM_018672	23461	1.06139	1.08526	1.43451
ABCA5	3780445	NM_018672	23461	1.02308	1.21159	0.735964
ABCA6	6940519	NM_080284	23460	1.07822	1.05904	1.10588
ABCA7	2570100	NM_019112	10347	2.2753	2.09088	0.865708
ABCA7	1710193	NM_019112	10347	0.622254	0.546875	0.758891
ABCA8	150035	NM_007168	10351	1.41105	1.11871	0.577257
ABCA8	2710392	NM_007168	10351	0.82556	0.730365	0.952284
ABCA9	4730370	NM_080283	10350	0.925848	0.951779	0.85226
ABCA9	5220386	NM_080283	10350	0.917934	1.326	0.583564
ABCB1	4210039	NM_000927	5243	1.0044	0.705192	0.939083
ABCB1	1230048	NM_000927	5243	0.901562	0.906478	0.910062
ABCB10	4810048	NM_012089	23456	0.728824	0.804253	0.713995
ABCB11	7330332	NM_003742	8647	1.12388	0.914382	1.37085
ABCB4	1070594	NM_018850	5244	1.84643	1.64622	0.754607
ABCB6	2810367	NM_005689	10058	3.48076	3.24679	0.766534
ABCB7	5700286	NM_004299	22	1.0512	1.60336	1.39457
ABCB8	3990592	NM_007188	11194	0.731031	1.48087	1.09336
ABCB9	6900241	NM_019624	23457	1.79389	0.55602	1.41031
ABCB9	5290598	NM_019624	23457	1.36388	0.973324	0.975155
ABCB9	2600315	NM_203444	23457	0.743405	0.811585	0.672657
ABCC1	1500187	NM_019900	4363	1.38947	1.57471	1.52453
ABCC10	650646	NM_033450	89845	0.727563	0.767677	0.904996
ABCC11	2600541	NM_033151	85320	1.18745	1.08132	1.00744
ABCC11	110138	NM_145186	85320	0.843126	1.15834	1.0021
ABCC12	6290348	NM_033226	94160	0.435126	0.776754	0.947849
ABCC13	3990441	NR_003087	150000	0.616499	0.783129	1.24183
ABCC2	2230746	NM_000392	1244	1.25021	1.2412	1.1582
ABCC3	270615	NM_003786	8714	4.49376	4.0374	1.33453
ABCC4	6110181	NM_005845	10257	4.17781	10.3951	1.26796
ABCC4	2450201	NM_005845	10257	3.00855	8.63994	1.20081
ABCC5	3460630	NM_001023587	10057	1.10495	0.91689	0.736619
ABCC5	6580553	NM_005688	10057	0.95673	0.736244	1.00426
ABCC5	7610050	NM_001023587	10057	0.719859	0.602695	1.02948
ABCC6	7160603	NM_001079528	368	1.04769	1.29512	0.87898
ABCC6	3060279	NM_001171	368	0.985873	1.43581	0.694473
ABCC6	7100390	NM_001171	368	0.926679	0.968685	0.814172
ABCC6	4230093	NM_001171	368	0.673839	1.25156	1.66741
ABCC6	5310021	NM_001079528	368	0.626477	0.72548	0.671058
ABCC9	3370408	NM_005691	10060	1.18274	1.48494	1.40505
ABCC9	4040025	NM_020298	10060	0.956247	0.986976	1.54327
ABCD1	4890609	NM_000033	215	0.642157	0.766962	0.672359
ABCD2	2940709	NM_005164	225	0.714971	0.986959	0.97153
ABCD3	1580736	NM_002858	5825	1.01126	0.890701	0.649626
ABCD4	3130209	NR_003256	5826	0.73536	0.989196	0.997707
ABCE1	1090543	NM_001040876	6059	0.673123	0.41871	0.818736
ABCE1	5310152	NM_001040876	6059	0.665604	0.507243	0.610706
ABCF1	7380113	NM_001025091	23	0.693058	0.396522	0.797405
ABCF1	2190273	NM_001025091	23	0.670556	0.492288	0.607528
ABCF2	2230039	NM_005692	10061	1.10756	0.622329	0.54827
ABCF2	5420142	NM_005692	10061	0.959241	0.820929	0.54512
ABCF2	7100039	NM_007189	10061	0.392825	0.406333	0.609692
ABCF3	4560689	NM_018358	55324	0.707438	1.13589	0.750954
ABCG1	5860377	NM_016818	9619	1.00266	1.00078	1.25317
ABCG1	6450059	NM_207174	9619	0.889122	0.685195	1.46061
ABCG1	3440292	NM_207627	9619	0.736485	0.822381	1.11929
ABCG1	6060377	NM_016818	9619	0.644567	0.597442	1.18619
ABCG2	7160220	NM_004827	9429	0.595252	0.714086	3.07112
ABCG4	3360390	NM_022169	64137	1.00098	0.848736	1.28757
ABCG5	6290575	NM_022436	64240	1.50096	0.967041	1.46579
ABCG8	2690367	NM_022437	64241	1.15418	1.2734	1.31917
ABHD1	620113	NM_032604	84696	1.35515	0.937824	1.21969
ABHD10	1300328	NM_018394	55347	0.719129	1.24695	1.15941
ABHD11	6110592	NM_148912	83451	2.32073	2.1334	0.594316
ABHD12	7100615	NM_001042472	26090	1.19635	1.41278	0.71424
ABHD12	2710615	NM_015600	26090	0.728702	0.534947	0.893253
ABHD12	7610382	NM_001042472	26090	0.610728	0.710488	0.952811
ABHD12B	2690040	NM_181533	145447	1.19835	0.988249	0.856017
ABHD12B	3120274	NM_181533	145447	0.882148	0.95349	0.881808
ABHD12B	4880437	NM_181533	145447	0.874771	1.52501	1.10327
ABHD13	5870288	NM_032859	84945	1.35809	1.31797	1.21501
ABHD13	4810600	NM_032859	84945	1.1079	1.07041	1.03188
ABHD14A	1430360	NM_015407	25864	0.858926	0.851628	1.43262
ABHD14B	150064	NM_032750	84836	0.534156	1.09468	1.16231
ABHD15	5340450	NM_198147	116236	0.679917	0.419922	0.809761
ABHD16A	5910220	NM_021160	7920	0.805896	0.822506	0.944371
ABHD2	6900475	NM_152924	11057	1.24011	1.17109	0.69873
ABHD2	6520291	NM_007011	11057	1.07794	1.01508	0.268652
ABHD2	2970201	NM_152924	11057	1.06476	1.23946	0.956362
ABHD3	5050241	NM_138340	171586	0.763386	0.846221	0.734426
ABHD4	3120014	NM_022060	63874	1.3716	3.37099	1.21907
ABHD5	5860215	NM_016006	51099	0.877967	0.335643	0.799721
ABHD6	2690402	NM_020676	57406	0.88919	0.789903	1.28366
ABHD8	4880288	NM_024527	79575	1.45611	1.21954	1.09821
ABI1	5130725	NM_001012751	10006	0.919769	0.641595	1.15037
ABI1	3520706	NM_005470	10006	0.782021	0.799451	1.11874
ABI3	3840717	NM_016428	51225	0.578341	0.64544	0.725598
ABI3BP	6980739	NM_015429	25890	1.60132	1.48571	0.958301
ABL1	4180088	NM_005157	25	0.860235	0.488268	0.742784
ABL1	4590440	NM_007313	25	0.841453	1.02384	1.09493
ABL1	4880170	NM_005157	25	0.727441	0.648885	0.838563
ABL2	1990288	NM_007314	27	1.23342	1.03517	0.973951
ABL2	2510520	NM_005158	27	0.925219	1.3776	1.52825
ABL2	4670717	NM_007314	27	0.692653	0.654588	0.931179
ABLIM1	6400243	NM_001003407	3983	2.24372	2.36942	1.68923
ABLIM1	6130162	NM_002313	3983	1.21348	1.05578	0.822209
ABLIM1	3610315	NM_006720	3983	0.806498	0.753757	0.966797
ABLIM1	2570112	NM_006720	3983	0.665847	0.553118	2.26181
ABLIM2	2260471	NM_032432	84448	1.00541	0.798788	1.08898
ABLIM3	2350747	NM_014945	22885	1.51926	2.12304	1.05454
ABO	1240575	NM_020469	28	1.13159	0.827768	0.471688
ABP1	5420440	NM_001091	26	1.49441	1.70879	0.647452
ABR	6270753	NM_021962	29	1.29628	1.71718	1.65384
ABR	620240	NM_001092	29	0.852536	1.62159	1.46417
ABR	5860431	NM_001092	29	0.844264	0.78186	1.30114
ABT1	6480392	NM_013375	29777	0.799849	0.81886	0.756565
ABTB2	940148	NM_145804	25841	0.60137	0.829011	2.02969
ACAA1	3520753	NM_001607	30	0.752542	0.899011	0.768939
ACAA2	1450093	NM_006111	10449	0.913976	1.11794	0.970105
ACACA	2190414	NM_198836	31	0.705783	0.541838	0.624955
ACACA	6650328	NM_198839	31	0.701661	0.753601	1.31689
ACACA	2630692	NM_198839	31	0.651228	0.682142	0.722732
ACACB	2230678	NM_001093	32	1.33821	1.58124	1.34529
ACAD10	6560327	NM_025247	80724	0.883289	0.746607	0.848996
ACAD11	3370136	NM_032169	84129	0.821904	0.4845	1.86508
ACAD8	2650324	NM_014384	27034	0.995108	0.725988	0.814624
ACAD8	730671	NM_014384	27034	0.800301	0.400091	0.858946
ACAD9	5340561	NM_014049	28976	0.85153	0.548656	0.921352
ACADL	130193	NM_001608	33	0.886507	0.80735	0.442049
ACADM	430139	NM_000016	34	1.90045	1.42585	0.830198
ACADM	2470279	NM_000016	34	0.939187	0.906688	1.00455
ACADS	110441	NM_000017	35	1.14841	2.09969	1.17751
ACADSB	3610136	NM_001609	36	0.764381	1.1077	0.846893
ACADVL	610093	NM_000018	37	3.59741	3.27293	1.11339
ACADVL	1170647	NM_001033859	37	1.22228	1.16769	1.40894
ACADVL	1240551	NM_000018	37	1.19366	1.35149	1.25064
ACAN	4480747	NM_001135	176	0.834087	0.67675	1.30972
ACAP1	7210682	NM_014716	9744	0.554671	1.45075	1.6809
ACAP2	3060747	NM_012287	23527	0.885982	1.28225	1.43194
ACAP2	60746	NM_012287	23527	0.728983	0.659001	1.21354
ACAP3	4850215	NM_030649	116983	1.11614	1.43935	0.551239
ACAT1	2070605	NM_000019	38	0.782454	0.255591	0.71766
ACAT2	7330753	NM_005891	39	0.811328	0.733122	0.69714
ACBD3	5890112	NM_022735	64746	1.084	0.838068	1.27376
ACBD4	70068	NM_024722	79777	0.715618	0.727445	0.751735
ACBD5	150156	NM_145698	91452	1.7397	1.29732	1.49244
ACBD5	4060435	NM_145698	91452	1.43036	1.47251	0.595331
ACBD6	870349	NM_032360	84320	1.10743	0.94357	1.40141
ACCN2	1690050	NM_001095	41	0.891797	1.37327	0.703473
ACCN3	6130451	NM_020321	9311	1.04021	0.926921	1.63508
ACCN3	6110482	NM_020322	9311	0.871504	0.658676	0.976234
ACCN4	3190082	NM_018674	55515	1.24636	3.3144	0.845366
ACCN4	6130408	NM_018674	55515	0.946094	1.13326	0.87897
ACCS	4860070	NM_032592	84680	1.41882	4.25119	1.4879
ACD	1300154	NM_022914	65057	0.728134	1.61101	0.858926
ACE	3830398	NM_000789	1636	1.28553	1.021	1.00248
ACER2	1010307	NM_001010887	340485	1.14519	0.874354	1.12693
ACER3	1230017	NM_018367	55331	0.855648	0.828588	0.794122
ACHE	1170594	NM_000665	43	1.4593	1.49311	1.28217
ACHE	1710500	NM_015831	43	1.08937	0.864635	0.942232
ACHE	2190168	NM_015831	43	0.876791	0.921852	1.52342
ACIN1	4860204	NM_014977	22985	0.712214	1.14599	1.19453
ACLY	4290279	NM_001096	47	1.16407	0.575584	0.601436
ACLY	4200259	NM_198830	47	0.613907	0.507147	0.564806
ACN9	520575	NM_020186	57001	1.51099	0.860523	0.849129
ACN9	6040088	NM_020186	57001	0.974745	0.914295	0.826054
ACO1	2450608	NM_002197	48	0.932514	0.867548	1.01969
ACO2	3930639	NM_001098	50	1.25387	1.69708	0.79871
ACOT1	4900438	NM_001037161	641371	2.50229	1.99209	0.861185
ACOT1	4810471	NM_001037161	641371	0.714261	0.844185	1.49245
ACOT11	7400315	NM_015547	26027	1.19214	1.30469	0.653938
ACOT11	1050253	NM_147161	26027	0.656196	0.683142	0.990148
ACOT12	2070181	NM_130767	134526	0.661775	0.723176	0.941485
ACOT13	1580427	NM_018473	55856	0.991259	1.20281	0.891468
ACOT2	6290059	NM_006821	10965	4.50161	4.4863	0.989522
ACOT2	1230189	NM_006821	10965	1.41436	1.18964	0.857928
ACOT4	4780709	NM_152331	122970	1.6835	1.2399	0.949282
ACOT7	2320553	NM_181866	11332	1.23506	1.70227	1.36221
ACOT7	6580639	NM_007274	11332	0.947127	1.63991	0.712877
ACOT7	4290050	NM_181864	11332	0.723964	0.916206	0.601193
ACOT8	2900291	NM_005469	10005	1.48331	2.18762	0.70118
ACOT9	7160592	NM_001033583	23597	2.31633	1.70717	0.736852
ACOT9	5220497	NM_001037171	23597	1.00795	0.388585	0.94976
ACOX1	3940408	NM_007292	51	1.08161	0.802422	1.04517
ACOX1	1190327	NM_007292	51	1.05114	0.81925	0.676074
ACOX1	6180324	NM_004035	51	0.798002	0.852747	1.3227
ACOX2	1010114	NM_003500	8309	0.722728	0.749434	0.696101
ACOX3	4540010	NM_003501	8310	0.932543	0.782702	0.618239
ACP1	6110672	NM_001040649	52	2.08948	1.66186	1.23365
ACP1	1500152	NM_007099	52	1.44539	1.99104	0.96144
ACP2	2480025	NM_001610	53	0.881589	1	0.579302
ACP5	7050082	NM_001611	54	0.897638	1.55623	0.86244
ACP6	4670671	NM_016361	51205	0.590088	1.04334	2.22529
ACPL2	5720537	NM_152282	92370	0.742742	0.641066	1.1623
ACPL2	3800538	NM_152282	92370	0.735858	0.622581	1.49445
ACPP	2680725	NM_001099	55	0.550464	0.626592	0.618271
ACPT	2690369	NM_033068	93650	0.577096	0.955889	0.871345
ACR	6900576	NM_001097	49	0.841435	1.07749	0.674923
ACRBP	7510253	NM_032489	84519	1.85763	2.6192	1.57722
ACRC	3850192	NM_052957	93953	1.08412	1.12988	0.967867
ACRV1	5550075	NM_020109	56	1.00856	1.15907	1.42499
ACRV1	2570576	NM_020115	56	0.991565	1.26579	0.761406
ACSBG1	2480730	NM_015162	23205	0.899298	0.994613	1.02167
ACSBG2	1660376	NM_030924	81616	1.02103	1.19996	0.907251
ACSF2	1850164	NM_025149	80221	0.843269	1.70431	0.897159
ACSF3	5820142	NM_174917	197322	0.807061	0.912943	0.975847
ACSL1	1030431	NM_001995	2180	0.957464	0.40236	1.16543
ACSL3	3440367	NM_004457	2181	1.27686	1.22129	1.22783
ACSL3	3930593	NM_004457	2181	1.11491	0.601711	0.597486
ACSL3	1580524	NM_203372	2181	0.703066	0.4886	0.928172
ACSL4	130131	NM_022977	2182	1.81584	1.78956	1.32886
ACSL4	7000307	NM_004458	2182	1.49547	0.476752	1.38148
ACSL5	6400707	NM_016234	51703	2.0487	2.48742	1.52364
ACSL5	2320332	NM_203379	51703	0.708212	1.09806	1.22148
ACSL5	620577	NM_203379	51703	0.691007	0.471646	0.964701
ACSL5	7040286	NM_016234	51703	0.63984	0.72954	1.04734
ACSL6	5570477	NM_015256	23305	1.60623	0.951731	0.450223
ACSL6	5890040	NM_001009185	23305	1.11883	0.62229	0.30415
ACSL6	6770255	NM_015256	23305	1.01858	1.1528	0.74745
ACSL6	1190746	NM_001009185	23305	0.946991	1.0502	1.72434
ACSM1	5870669	NM_052956	116285	0.997533	1.05201	0.716439
ACSM2A	6350379	NM_001010845	123876	1.29658	0.916709	1.25508
ACSM2A	6550452	NM_001010845	123876	0.87708	0.979984	1.18609
ACSM2B	4760202	NM_182617	348158	0.763905	0.563638	1.53286
ACSM3	6580735	NM_005622	6296	2.39796	1.82175	1.11305
ACSM3	3840632	NM_005622	6296	1.91136	0.742266	0.971056
ACSM3	4180292	NM_202000	6296	1.50671	0.910126	0.880739
ACSM4	6980181	NM_001080454	341392	0.944269	0.75113	0.877476
ACSM5	4880736	NM_017888	54988	1.12849	1.16133	0.916763
ACSM5	4850092	NM_017888	54988	1.00318	1	0.617496
ACSS1	5220377	NM_032501	84532	0.540726	0.423572	0.807294
ACSS2	1980709	NM_018677	55902	1.07657	0.898994	1.08764
ACSS2	4490524	NM_001076552	55902	0.639188	0.495846	1.28117
ACSS2	4670544	NM_018677	55902	0.633296	0.435251	1.40512
ACSS3	2810154	NM_024560	79611	0.799329	1.39878	1.12848
ACTA1	5080132	NM_001100	58	1.06641	1.54822	1.13154
ACTA2	6480059	NM_001613	59	3.92517	3.41834	1.43674
ACTB	5270730	NM_001101	60	4.07325	5.14191	0.857708
ACTB	5570132	NM_001101	60	1.04551	1.15908	0.794355
ACTB	4610390	NM_001101	60	0.868969	1.14366	0.844355
ACTBL2	670315	NM_001017992	345651	0.964303	0.868384	1.03167
ACTC1	6940739	NM_005159	70	0.934587	0.933486	2.03141
ACTC1	4260201	NM_005159	70	0.657405	0.547525	1.15901
ACTG1	6510072	NM_001614	71	18.5605	22.239	1.15999
ACTG1	3310424	NM_001614	71	1.10121	0.575073	0.833895
ACTG2	4610431	NM_001615	72	1.38495	1.39418	0.643438
ACTL6A	5220358	NM_004301	86	1.11791	0.605134	0.531269
ACTL6A	5080603	NM_177989	86	0.930718	0.710102	0.611548
ACTL7A	6960669	NM_006687	10881	1.00918	0.951706	0.807121
ACTL7B	7550092	NM_006686	10880	0.986921	1.04513	0.92176
ACTL8	1450100	NM_030812	81569	0.788126	1.22495	1.03182
ACTL9	4590184	NM_178525	284382	1.25432	1.47416	1.34763
ACTN1	5080364	NM_001102	87	0.752356	0.810667	0.955252
ACTN4	270437	NM_004924	81	0.883521	1.71436	0.894972
ACTR10	2630064	NM_018477	55860	1.6522	1.10214	2.06016
ACTR1A	4280561	NM_005736	10121	0.731519	0.578669	0.582546
ACTR1B	2120088	NM_005735	10120	0.977687	1.17287	1.07559
ACTR2	5570196	NM_001005386	10097	1.16063	0.811872	0.707881
ACTR3	6940176	NM_005721	10096	1.07901	0.311137	0.809833
ACTR3B	2750403	NM_020445	57180	1.39062	1.10156	0.708039
ACTR3B	5490278	NM_001040135	57180	1.33403	1.08587	0.648625
ACTR3B	4010066	NM_020445	57180	1.15263	1.39349	1.16781
ACTR5	2690670	NM_024855	79913	0.683241	0.498448	0.741636
ACTR6	1580168	NM_022496	64431	0.961901	0.765655	0.869045
ACTR8	270278	NM_022899	93973	0.795534	0.805068	0.867944
ACTRT1	2710368	NM_138289	139741	1.08067	1.35403	0.824419
ACTRT2	2600754	NM_080431	140625	0.978066	0.86897	1.52082
ACVR1	6940360	NM_001105	90	1.74307	0.898969	1.25339
ACVR1B	1410132	NM_004302	91	1.53306	1.1237	1.43976
ACVR1B	6510717	NM_020327	91	1.13485	0.940094	2.1333
ACVR1B	2060615	NM_020328	91	0.987181	1.23209	0.577084
ACVR1B	4570240	NM_004302	91	0.793067	1.15833	1.16361
ACVR2A	4260681	NM_001616	92	0.885922	0.974089	0.98635
ACVR2A	4590349	NM_001616	92	0.643924	0.903521	1.0796
ACVR2B	1450253	NM_001106	93	0.859658	1.41721	1.20421
ACVRL1	4610746	NM_000020	94	1.09895	0.578689	0.583461
ACY1	1400341	NM_000666	95	0.912624	0.801902	0.853654
ACY3	1170228	NM_080658	91703	0.449249	4.20926	1.59015
ACYP1	3440689	NM_001107	97	1.30314	1.71657	1.36646
ACYP1	5910148	NM_001107	97	1.11966	1.65686	1.05507
ACYP1	5960142	NM_203488	97	0.959271	0.841141	0.520059
ACYP2	5290672	NM_138448	98	0.880495	1.12663	1.18405
ACYP2	130367	NM_138448	98	0.853966	1.13394	0.691992
ADA	7210192	NM_000022	100	0.788484	0.595572	0.929866
ADAD2	3400424	NM_139174	161931	1.12987	0.463048	1.4456
ADAL	5910554	NM_001012969	161823	1.0764	0.979169	1.12745
ADAM10	5290300	NM_001110	102	1.98762	0.911067	1.05174
ADAM10	3130364	NM_001110	102	1.50891	1.22919	0.785443
ADAM11	1260661	NM_002390	4185	0.809982	1.4099	2.5948
ADAM12	6180392	NM_003474	8038	0.748451	0.978519	0.713051
ADAM15	1980553	NM_003815	8751	1.36886	1.30024	0.809243
ADAM15	6480131	NM_207195	8751	1.07685	1.58009	0.720683
ADAM15	3440452	NM_207195	8751	0.94168	0.599453	0.894757
ADAM17	5420762	NM_003183	6868	1.27321	1.59528	1.10198
ADAM17	5260546	NM_003183	6868	0.912401	1.05377	1.03679
ADAM18	6560010	NM_014237	8749	1.02819	0.969106	0.610643
ADAM19	6900209	NM_033274	8728	0.574248	0.623833	1.26355
ADAM19	5220341	NM_033274	8728	0.502662	0.921734	0.835935
ADAM2	6110315	NM_001464	2515	1.24762	1.27605	0.836287
ADAM20	2320270	NM_003814	8748	1.20001	1.30973	0.576119
ADAM21	2690368	NM_003813	8747	0.841268	0.746045	0.746689
ADAM22	2490255	NM_021722	53616	1.37916	1.01461	0.493693
ADAM22	1470039	NM_021723	53616	1.33943	1.21917	0.778311
ADAM22	7400600	NM_021721	53616	0.81141	0.671535	1.0245
ADAM23	110731	NM_003812	8745	0.507708	1.12424	0.569047
ADAM28	290451	NM_021777	10863	1.4245	1.20842	0.693187
ADAM28	6180491	NM_021777	10863	1.41387	2.24779	1.44842
ADAM28	7330333	NM_014265	10863	1.06797	2.24408	1.32613
ADAM29	1770672	NM_014269	11086	0.819208	0.791853	1.13264
ADAM32	5860541	NM_145004	203102	0.913733	0.895899	0.870845
ADAM32	5050328	NM_145004	203102	0.887194	0.783883	1.04716
ADAM32	6450164	NM_145004	203102	0.0400639	0.807731	0.694457
ADAM33	3420025	NM_153202	80332	1.51381	0.884708	2.65091
ADAM33	1440224	NM_025220	80332	0.987971	1.03512	0.890724
ADAM6	6480634	NR_002224	8755	1.29948	1.0808	0.917543
ADAM6	7040601	NR_002224	8755	1.19562	0.983132	1.46494
ADAM7	1260424	NM_003817	8756	0.857763	0.773419	1.12693
ADAM8	780725	NM_001109	101	1.05546	3.18068	1.58045
ADAM9	2940730	NM_003816	8754	0.999234	0.908746	0.958398
ADAMDEC1	1690192	NM_014479	27299	1.2561	1.40417	1.40386
ADAMDEC1	2470184	NM_014479	27299	0.868426	1.09782	1.31227
ADAMTS1	6900086	NM_006988	9510	1.63151	1.02206	0.91973
ADAMTS10	840370	NM_030957	81794	1.18897	1.32961	0.780943
ADAMTS13	4200735	NM_139027	11093	1.06272	1.18056	0.644769
ADAMTS13	1030253	NM_139027	11093	0.758554	0.866954	1.18444
ADAMTS14	7610372	NM_139155	140766	1.92244	1.36548	1.12556
ADAMTS14	2000538	NM_080722	140766	1.00105	0.834945	1.43441
ADAMTS15	6520458	NM_139055	170689	1.23753	0.920961	1.37356
ADAMTS18	3290133	NM_199355	170692	1.26046	0.87285	0.934002
ADAMTS18	2030487	NM_199355	170692	1.11572	0.966164	1.50774
ADAMTS19	70487	NM_133638	171019	0.971444	1.09987	1.61598
ADAMTS2	7150609	NM_021599	9509	0.936663	1.03816	1.13224
ADAMTS2	3400600	NM_014244	9509	0.935452	1.13579	1.69149
ADAMTS20	4010035	NM_025003	80070	0.881234	0.81175	0.543268
ADAMTS3	2120364	NM_014243	9508	1.42796	1.22071	1.30621
ADAMTS4	1660497	NM_005099	9507	1.08599	0.967023	0.745762
ADAMTS6	20100	NM_197941	11174	0.791942	1.12227	1.08489
ADAMTS7	3440451	NM_014272	11173	0.945249	0.859303	0.914114
ADAMTS8	2480239	NM_007037	11095	0.739735	0.536433	0.807017
ADAMTS9	1570382	NM_182920	56999	0.715984	1.18159	1.04296
ADAMTSL1	3140368	NM_001040272	92949	1.00415	0.804741	1.19508
ADAMTSL1	5890326	NM_052866	92949	0.816819	0.67228	0.704412
ADAMTSL2	4810575	NM_014694	9719	0.802694	1.34931	1.06471
ADAMTSL4	780315	NM_019032	54507	1.6536	1.57111	0.861297
ADAMTSL4	10286	NM_025008	54507	1.11913	0.789881	0.595619
ADAMTSL4	780678	NM_025008	54507	0.876657	0.647461	1.14797
ADAMTSL5	3460356	NM_213604	339366	0.903379	0.883381	0.782895
ADAP1	830735	NM_006869	11033	0.932929	0.302673	1.36128
ADAP2	3990433	NM_018404	55803	0.868464	1.0384	0.817186
ADAR	5130612	NM_001025107	103	0.79591	0.684291	1.02125
ADAR	2900450	NM_001111	103	0.741221	0.932121	0.826454
ADAR	5490433	NM_015840	103	0.69159	1.04017	0.848442
ADARB1	2320228	NM_001112	104	1.51293	1.4504	1.79199
ADARB1	4760079	NM_015833	104	1.23796	1.64948	1.00161
ADARB1	7330097	NM_001112	104	0.970144	0.968404	1.40003
ADARB2	6110519	NM_018702	105	1.17947	0.961548	1.12363
ADAT1	1710204	NM_012091	23536	1.15852	0.979626	0.736711
ADAT2	2230722	NM_182503	134637	0.796442	0.811414	0.89117
ADAT3	2230253	NM_138422	113179	0.55722	0.657271	0.871354
ADC	130707	NM_052998	113451	0.742602	1.12546	1.38441
ADCK2	1780647	NM_052853	90956	0.640239	0.85887	1.02319
ADCK3	6220180	NM_020247	56997	1.1671	0.624872	1.37219
ADCK4	4290053	NM_024876	79934	0.76819	1.36863	1.58688
ADCK5	2480709	NM_174922	203054	0.717738	0.768487	0.801137
ADCY1	580561	NM_021116	107	0.817879	0.719664	0.786457
ADCY1	610592	NM_021116	107	0.664153	0.652027	2.61348
ADCY2	2970288	NM_020546	108	1.29844	0.771852	0.904027
ADCY3	3800050	NM_004036	109	0.821632	0.662934	1.23842
ADCY4	6330224	NM_139247	196883	0.711538	2.0441	2.12902
ADCY5	1030187	NM_183357	111	1.08203	0.826952	0.918418
ADCY6	2190463	NM_020983	112	2.12233	1.28707	1.38199
ADCY6	3120600	NM_020983	112	1.74904	1.17005	1.75396
ADCY7	50735	NM_001114	113	1.32506	1.48322	1.08181
ADCY8	5310431	NM_001115	114	1.22455	1.19627	0.581403
ADCY9	3060100	NM_001116	115	0.79063	0.636948	0.944118
ADCYAP1	3060064	NM_001117	116	0.675069	0.863505	0.98167
ADD1	1230289	NM_001119	118	1.42345	0.816911	0.957547
ADD1	5900685	NM_176801	118	0.822985	0.882294	0.872322
ADD2	6040601	NM_017488	119	1.89839	2.02041	0.710287
ADD3	3420747	NM_001121	120	2.09267	3.89261	1.40362
ADD3	1010477	NM_016824	120	1.36042	2.74631	1.50509
ADD3	1990468	NM_001121	120	1.01408	0.793252	1.4389
ADH1C	1510750	NM_000669	126	0.762841	0.71751	1.22575
ADH4	7550632	NM_000670	127	0.732224	0.734427	1.13717
ADH4	5490382	NM_000670	127	0.726657	0.905924	1.09883
ADH6	3800368	NM_000672	130	1.16616	0.922232	0.691614
ADH7	3520709	NM_000673	131	0.820932	1.01241	1.46866
ADHFE1	2760121	NM_144650	137872	1.01783	3.0492	2.17686
ADI1	6620278	NM_018269	55256	0.84	0.608495	0.616372
ADIG	3800722	NM_001018082	149685	1.03049	1.43126	0.787311
ADIPOQ	4200471	NM_004797	9370	0.634099	0.711615	0.863848
ADIPOR1	6100767	NM_015999	51094	0.897771	1.61032	1.0762
ADIPOR1	3460201	NM_015999	51094	0.879415	1.14342	1.14765
ADIPOR2	6960685	NM_024551	79602	0.847192	1.14763	0.875532
ADK	7550161	NM_001123	132	2.19149	1.12876	1.24907
ADK	3130450	NM_006721	132	1.88156	1.62248	1.56889
ADK	1030241	NM_001123	132	0.704861	0.753576	0.830851
ADK	7100414	NM_001123	132	0.644796	0.764645	1.53411
ADM	5670465	NM_001124	133	6.84392	26.228	8.54463
ADNP	360678	NM_181442	23394	0.937511	0.475921	1.01977
ADNP	1770551	NM_015339	23394	0.8105	0.796357	1.88204
ADNP2	7330270	NM_014913	22850	0.951722	1.1159	0.776153
ADO	4480546	NM_032804	84890	0.75068	0.215891	0.968041
ADORA1	4060519	NM_000674	134	5.42331	4.35602	1.40719
ADORA1	2100110	NM_000674	134	0.640485	0.772024	0.880547
ADORA2A	7560440	NM_000675	135	0.678583	1.52793	1.67285
ADORA2B	2060040	NM_000676	136	2.42034	1.7874	1.33568
ADORA3	870138	NM_001081976	140	1.54431	2.19125	2.03717
ADPGK	5550619	NM_031284	83440	0.800627	0.882262	0.739096
ADPRH	5550369	NM_001125	141	0.925906	0.862932	1.30405
ADPRHL1	5570446	NM_138430	113622	1.06456	0.765101	1.46681
ADPRHL1	3390735	NM_199162	113622	0.705396	0.932312	1.85069
ADPRHL2	730010	NM_017825	54936	0.996176	0.446204	1.19065
ADRA1A	2690500	NM_033304	148	2.28119	1.57658	0.567979
ADRA1A	1070315	NM_033302	148	1.67347	1.79229	1.31764
ADRA1A	1110731	NM_000680	148	1.02818	1.00648	0.929039
ADRA1A	4590215	NM_033303	148	0.830346	0.944721	1.08914
ADRA1B	2140022	NM_000679	147	0.99433	1.03779	0.614965
ADRA1D	1340630	NM_000678	146	1.09624	1.648	0.914794
ADRA2A	5720523	NM_000681	150	1.70106	2.60422	0.802309
ADRA2B	3390286	NM_000682	151	0.849938	0.833153	0.603541
ADRB1	7050440	NM_000684	153	1.05389	0.724774	1.1376
ADRB2	7570326	NM_000024	154	0.63017	0.583418	1.49549
ADRB3	1430722	NM_000025	155	1.03116	0.96522	1.11725
ADRBK2	2120528	NM_005160	157	0.611412	0.817841	1.1664
ADRM1	4390121	NM_175573	11047	0.942656	0.875216	0.602264
ADRM1	4280136	NM_175573	11047	0.850954	0.690297	0.793106
ADSL	5870228	NM_000026	158	0.706249	0.689632	1.01398
ADSS	6020333	NM_001126	159	2.50471	0.724308	0.630575
ADSS	5960097	NM_001126	159	0.770648	0.656913	0.749402
ADSSL1	4830372	NM_152328	122622	1.19872	2.95521	1.4702
ADSSL1	4900703	NM_152328	122622	1.0786	1.04021	1.19057
ADSSL1	1660446	NM_199165	122622	0.703644	0.80291	1.06174
AEBP1	6580711	NM_001129	165	0.916621	0.884311	0.948553
AEBP2	4260671	NM_153207	121536	0.919648	0.718398	0.997303
AEN	4480288	NM_022767	64782	0.932504	0.318489	0.569529
AES	6180176	NM_198970	166	1.97014	2.29996	0.683428
AES	6660491	NM_198969	166	0.999009	1.02005	1.06947
AES	1230458	NM_001130	166	0.769947	1.04566	0.989789
AFAP1	2690187	NM_198595	60312	0.879698	1.0169	1.22623
AFAP1L1	20154	NM_152406	134265	1.01097	1.40322	0.941361
AFAP1L2	4590133	NM_001001936	84632	1.57262	2.29544	1.23842
AFAP1L2	6620711	NM_032550	84632	0.991113	1.93204	1.1207
AFF1	6060142	NM_005935	4299	2.25112	1.93549	1.9136
AFF1	3990673	NM_005935	4299	0.895707	1.02427	1.48494
AFF3	2230273	NM_001025108	3899	1.02819	0.980579	1.41282
AFF3	650753	NM_001025108	3899	0.620262	0.617156	1.23477
AFF4	2360189	NM_014423	27125	1.5214	1.56404	1.41578
AFG3L1P	3180403	NR_003228	172	1.36352	1.61336	1.5802
AFG3L1P	730730	NR_003226	172	0.868992	0.921633	1.01468
AFG3L1P	5670274	NR_003228	172	0.825486	0.684687	1.19513
AFG3L2	1170538	NM_006796	10939	0.464869	0.32882	0.6879
AFM	3120681	NM_001133	173	0.969977	1.06428	1.12043
AFMID	2000497	NM_001010982	125061	1.04339	0.811857	0.921172
AFMID	2070707	NM_001010982	125061	0.952185	0.990887	0.893436
AFP	2030161	NM_001134	174	1.37231	1.18158	1.41701
AFTPH	5570543	NM_203437	54812	1.15669	0.672501	1.20603
AFTPH	450097	NM_017657	54812	1.03633	1.33518	0.917803
AFTPH	2070600	NM_203437	54812	0.955347	0.658391	1.1533
AGA	130064	NM_000027	175	0.609273	0.38137	0.855096
AGAP1	7400333	NM_001037131	116987	1.2044	0.792919	1.16367
AGAP1	4220692	NM_014914	116987	0.839388	0.713061	1.21393
AGAP1	2340563	NM_001037131	116987	0.778824	1.23543	0.90885
AGAP2	3140608	NM_014770	116986	0.872149	1.3875	0.955728
AGAP3	1510615	NM_001042535	116988	1.28757	1.64858	0.664261
AGAP3	3890431	NM_001042535	116988	0.895973	0.488048	1.22379
AGAP3	6220164	NM_031946	116988	0.627253	0.511859	0.764402
AGAP4	5820544	NM_133446	119016	1.52247	1.80073	0.905359
AGAP6	770424	NM_001077665	414189	0.664321	0.568589	1.35502
AGBL2	4890338	NM_024783	79841	1.02491	0.961137	0.845639
AGBL4	520379	NM_032785	84871	1.40786	1.12714	0.85968
AGBL5	1570035	NM_021831	60509	0.956102	1.33574	1.66087
AGBL5	1850075	NM_001035507	60509	0.918969	1.0485	1.12061
AGBL5	6620403	NM_021831	60509	0.701692	1.52382	0.910872
AGER	1940465	NM_001136	177	1.03798	1.02201	1.28586
AGER	7200369	NM_001136	177	0.97555	1.1257	0.942336
AGER	6620523	NM_001136	177	0.586895	0.941192	0.833064
AGFG1	1500341	NM_004504	3267	1.46763	1.20877	0.603985
AGFG1	6200736	NM_004504	3267	1.2336	1.26788	1.15359
AGFG2	5550538	NM_006076	3268	0.947624	0.882392	0.689962
AGGF1	5130102	NM_018046	55109	0.962816	1.03629	0.732468
AGGF1	70239	NM_018046	55109	0.873912	0.653711	0.933246
AGK	7560452	NM_018238	55750	0.938105	0.623306	0.919848
AGL	1440661	NM_000642	178	1.41504	1.23127	0.635563
AGL	2060255	NM_000646	178	1.20243	0.790794	0.900141
AGL	2940113	NM_000645	178	0.9415	0.505503	0.89714
AGL	7000672	NM_000642	178	0.910283	0.730864	1.10346
AGL	6110050	NM_000645	178	0.904499	0.993607	1.41517
AGL	1440653	NM_000646	178	0.888604	0.818737	0.828573
AGMAT	4890255	NM_024758	79814	0.979555	0.798944	0.745493
AGPAT1	990369	NM_006411	10554	1.16255	1.25191	1.95846
AGPAT1	4610044	NM_006411	10554	0.82229	1.74432	1.10178
AGPAT2	3850370	NM_006412	10555	1.56923	2.76375	0.986695
AGPAT2	3520671	NM_006412	10555	0.61898	0.592217	1.05506
AGPAT2	5560102	NM_001012727	10555	0.534184	0.47064	1.20352
AGPAT3	3850435	NM_020132	56894	2.48124	2.14807	1.03458
AGPAT3	620064	NM_001037553	56894	1.06458	1.28322	3.12856
AGPAT3	2120204	NM_020132	56894	1.01839	1.42902	1.43632
AGPAT4	3440025	NM_020133	56895	0.791778	0.712984	1.05791
AGPAT5	830719	NM_018361	55326	3.77092	4.2553	1.0869
AGPAT9	2060477	NM_032717	84803	0.681081	0.622808	1.52612
AGPHD1	6660041	NM_001013619	123688	0.94126	1.01044	1.24022
AGPHD1	620142	NM_001013619	123688	0.913515	1.14272	0.945834
AGPS	7560154	NM_003659	8540	1.26407	0.777532	0.920066
AGR2	3140463	NM_006408	10551	0.970811	0.853028	0.877007
AGR3	5290273	NM_176813	155465	1.03491	0.991896	0.941643
AGRN	6370500	NM_198576	375790	0.819783	1.01227	1.38677
AGRP	2690392	NM_001138	181	0.8811	1.13319	0.768883
AGTPBP1	4760427	NM_015239	23287	0.898908	0.748672	1.36938
AGTPBP1	2340347	NM_015239	23287	0.639572	0.387726	1.04149
AGTR1	940040	NM_004835	185	1.27782	1.23746	1.04981
AGTR1	160682	NM_000685	185	1.12336	1.38009	1.56719
AGTR2	5550437	NM_000686	186	1.36981	1.18558	0.426913
AGTRAP	4900685	NM_001040194	57085	0.770391	1.22959	0.849748
AGTRAP	4610220	NM_001040196	57085	0.662603	1.01319	1.03438
AGXT	270709	NM_000030	189	0.888252	1.01768	0.877446
AGXT2	6350753	NM_031900	64902	1.12419	1.01479	1.3847
AGXT2L1	2600768	NM_031279	64850	1.0095	0.923541	0.751677
AGXT2L1	2360762	NM_031279	64850	0.745766	1.02806	0.859937
AGXT2L2	5690082	NM_153373	85007	1.76465	5.55984	1.26888
AGXT2L2	870139	NM_153373	85007	1.02579	2.83829	1.63923
AHCTF1	6040747	NM_015446	25909	0.924489	0.826919	0.792744
AHCTF1	1230196	NM_015446	25909	0.698625	0.446435	0.781465
AHCY	3710537	NM_000687	191	1.39911	0.99946	0.775223
AHCYL1	1170440	NM_006621	10768	1.53518	0.658192	1.1942
AHCYL2	870039	NM_015328	23382	0.513383	0.74037	1.43092
AHDC1	4250376	NM_001029882	27245	0.92744	1.22184	1.24502
AHI1	5860253	NM_017651	54806	0.565975	0.632926	1.00641
AHNAK	2810482	NM_001620	79026	1.29143	1.15944	1.04223
AHNAK	3710400	NM_024060	79026	1.26511	1.19083	1.19458
AHNAK	450553	NM_001620	79026	1.09218	1.78895	1.66447
AHR	6060367	NM_001621	196	1.29243	1.13006	1.22701
AHR	4890672	NM_001621	196	0.935739	1.04432	1.57114
AHRR	5560433	NM_020731	57491	0.633395	0.789293	1.26187
AHSA1	4880561	NM_012111	10598	0.764182	0.748707	0.455933
AHSA2	1170220	NM_152392	130872	1.06814	0.653749	1.8686
AHSG	2320377	NM_001622	197	1.83949	1.61903	0.602924
AHSP	2350274	NM_016633	51327	0.680385	1.47164	0.694995
AICDA	6110358	NM_020661	57379	1.00184	1.70537	0.869661
AIF1	1940047	NM_001623	199	2.13021	1.73853	1.11369
AIF1	6520154	NM_004847	199	1.17912	0.791203	2.11402
AIF1	3800047	NM_032955	199	0.639723	1.01741	0.809883
AIF1L	4010647	NM_031426	83543	0.698422	0.629181	1.02949
AIFM1	1940577	NM_004208	9131	5.18614	2.91231	1.08051
AIFM1	5420414	NM_145812	9131	1.09915	0.99381	1.93683
AIFM1	1500689	NM_145813	9131	0.676543	0.455807	0.782998
AIFM1	3290341	NM_145813	9131	0.572536	0.57329	0.919577
AIFM2	270612	NM_032797	84883	0.931815	0.886539	0.99006
AIFM3	4260551	NM_001018060	150209	1.07535	1.07445	0.911795
AIG1	3940056	NM_016108	51390	1.69343	0.743356	1.32394
AIM1	580255	NM_001624	202	0.548746	0.501052	1.26022
AIM1L	6620386	NM_001039775	55057	1.27835	1.00103	1.21541
AIM1L	4220376	NM_001039775	55057	0.718753	0.728954	1.38536
AIM2	1260270	NM_004833	9447	0.75788	0.864869	0.611681
AIM2	130753	NM_004833	9447	0.737564	0.876813	1.02666
AIMP1	3710632	NM_004757	9255	0.890372	0.903065	0.653591
AIMP2	6960056	NM_006303	7965	0.852753	0.464991	0.626923
AIP	610689	NM_003977	9049	0.915811	2.0565	1.32716
AIPL1	3610138	NM_001033054	23746	0.834808	1.04536	0.870944
AIRE	2000093	NM_000658	326	1.38399	1.68463	1.1297
AIRE	5820689	NM_000383	326	1.29785	1.07975	1.1155
AIRE	5820386	NM_000383	326	1.06018	1.10523	1.3943
AJAP1	6480484	NM_001042478	55966	0.972127	1.03799	1.24987
AJAP1	1300647	NM_018836	55966	0.833089	1.00651	1.89403
AK1	5130162	NM_000476	203	0.86503	1.04022	1.26606
AK2	5720669	NM_001625	204	1.83047	0.738968	1.07887
AK2	1990491	NM_001625	204	1.31547	0.501582	0.906114
AK2	3140441	NM_013411	204	0.945572	0.382832	0.925628
AK3	670463	NM_016282	50808	0.754539	0.449633	0.893314
AK4	4610554	NM_203464	205	4.63286	3.41526	2.70303
AK4	160148	NM_013410	205	2.41712	0.734911	2.79859
AK4	4290192	NM_203464	205	2.2791	0.798659	3.38546
AK4	1470681	NM_203464	205	0.949271	1.10324	0.787249
AK5	2680220	NM_174858	26289	0.958344	1.04994	2.09511
AK5	6270148	NM_012093	26289	0.897311	0.958129	3.46757
AK8	6330358	NM_152572	158067	0.825289	1.47598	1.26608
AKAP1	4810494	NM_003488	8165	0.804307	0.323017	0.699063
AKAP10	460020	NM_007202	11216	1.49973	1.95751	1.82633
AKAP11	6420398	NM_016248	11215	1.07778	1.17209	1.05556
AKAP11	1070484	NM_016248	11215	0.968448	1.16923	1.79505
AKAP11	1450333	NM_016248	11215	0.961534	0.582643	1.32612
AKAP12	6940475	NM_005100	9590	1.76915	1.14781	1.04333
AKAP12	670041	NM_144497	9590	1.5774	1.48842	1.08852
AKAP12	3290564	NM_005100	9590	1.17867	0.986241	0.851916
AKAP12	6900706	NM_144497	9590	0.86832	0.972586	1.6811
AKAP13	3940440	NM_007200	11214	1.09	1.65932	1.07957
AKAP13	650050	NM_144767	11214	1.01851	2.2007	0.950762
AKAP13	2060341	NM_006738	11214	0.997498	1.56293	1.04921
AKAP17A	5570538	NM_005088	8227	0.889635	0.77704	1.31144
AKAP17A	4260750	NM_005088	8227	0.67163	0.494481	1.35539
AKAP2	6840608	NM_001004065	11217	1.12148	1.25264	0.962216
AKAP2	2970162	NM_001004065	11217	1.03239	0.857502	1.6185
AKAP2	3610068	NM_001004065	11217	0.918184	1.34112	0.542785
AKAP3	4860088	NM_006422	10566	0.808259	0.776423	0.71637
AKAP4	5560450	NM_139289	8852	1.15037	1.65451	0.620306
AKAP4	7100575	NM_139289	8852	1.1067	1.35655	0.674925
AKAP4	510008	NM_003886	8852	1.004	1.22277	1.59688
AKAP5	3800189	NM_004857	9495	1.00116	0.788581	0.815133
AKAP7	4780619	NM_016377	9465	1.94511	1.51446	1.06211
AKAP7	6380689	NM_004842	9465	1.22598	0.498052	0.779421
AKAP7	5340504	NM_004842	9465	0.61531	0.678739	0.898084
AKAP8	6550053	NM_005858	10270	0.512747	0.434109	0.982596
AKAP8L	5340593	NM_014371	26993	1.00679	0.953952	1.30296
AKAP9	3170630	NM_147185	10142	1.49402	1.6598	1.16344
AKD1	1190017	NM_145025	221264	0.810154	1.18388	0.743088
AKIRIN1	5820133	NM_024595	79647	3.12535	2.62632	0.750509
AKIRIN1	520040	NM_024595	79647	1.28134	0.789256	0.805862
AKIRIN1	1260544	NM_024595	79647	1.22586	0.959501	1.27172
AKIRIN2	5690202	NM_018064	55122	1.22594	1.70472	0.978114
AKNA	2850010	NM_030767	80709	0.424629	1.15777	1.18505
AKNAD1	3130605	NM_152763	254268	1.00284	0.84303	0.795062
AKNAD1	1070491	NM_152763	254268	0.86935	0.815057	1.6493
AKR1A1	5550543	NM_006066	10327	1.65167	1.58037	1.18025
AKR1A1	1500504	NM_006066	10327	0.837742	1.22823	1.12298
AKR1A1	6130424	NM_153326	10327	0.74684	0.910174	0.869137
AKR1B1	4260139	NM_001628	231	0.739465	0.624164	0.690784
AKR1C2	5340129	NM_001354	1646	0.882722	1.15235	1.00784
AKR1C3	7210632	NM_003739	8644	1.7392	2.57334	1.16894
AKR1C4	3120598	NM_001818	1109	4.97817	6.11528	0.897047
AKR1C4	2650736	NM_001818	1109	0.795736	1.07063	0.951668
AKR1D1	1770341	NM_005989	6718	0.941727	1.30889	1.34714
AKR1D1	5860347	NM_005989	6718	0.934722	1.02339	1.43803
AKR1E2	5720372	NM_001040177	83592	0.926019	0.9114	1.05232
AKR7A2	6180681	NM_003689	8574	1.16499	0.580687	1.33574
AKR7A2P1	1690086	NR_002796	246182	1.12094	1.30651	1.57063
AKR7A2P1	1110687	NR_002796	246182	1.04003	1.16883	1.02344
AKR7A3	70484	NM_012067	22977	0.985682	1.15295	1.05103
AKT1	7210424	NM_005163	207	1.31208	1.03971	1.39536
AKT1	6200431	NM_001014431	207	0.705636	0.622157	0.661339
AKT1	2470619	NM_001014432	207	0.638439	0.63614	0.91096
AKT1S1	3870092	NM_032375	84335	0.981756	1.40005	1.09999
AKT2	5570041	NM_001626	208	0.926838	0.754913	0.605894
AKT3	2570044	NM_181690	10000	1.33949	1.04793	1.39313
AKT3	5220307	NM_005465	10000	1.08486	1.08256	1.26003
AKT3	5870561	NM_181690	10000	0.954465	0.649933	0.980431
AKT3	5490246	NM_181690	10000	0.608119	0.94135	0.813175
AKTIP	5720703	NM_022476	64400	0.935012	0.883504	0.71695
AKTIP	4480338	NM_001012398	64400	0.634366	0.792936	0.971069
ALAD	2070397	NM_000031	210	1.37974	0.897406	1.21168
ALAS1	5860278	NM_199166	211	1.08189	0.995991	1.34192
ALAS1	7150014	NM_000688	211	1.02273	1.03828	1.36346
ALAS1	5220097	NM_000688	211	0.89374	1.15877	0.923955
ALAS2	4180768	NM_001037968	212	1.53177	7.58266	1.64121
ALAS2	5270338	NM_001037968	212	1.01196	1.25744	0.768551
ALAS2	1230376	NM_001037967	212	0.957382	2.91214	1.23786
ALB	5910010	NM_000477	213	2.99289	2.16188	1.12324
ALCAM	2070575	NM_001627	214	0.398328	0.247852	0.875107
ALDH16A1	940441	NM_153329	126133	1.01553	1.60465	0.652404
ALDH18A1	2370255	NM_002860	5832	0.912862	0.475754	0.90771
ALDH1A1	6510754	NM_000689	216	1.65387	1.02051	1.21824
ALDH1A1	1070477	NM_000689	216	1.18085	0.753413	0.704187
ALDH1A2	5700102	NM_170696	8854	1.00808	1.10535	1.48201
ALDH1A2	510687	NM_170697	8854	0.86755	1.02257	1.02179
ALDH1A3	2360551	NM_000693	220	0.682186	0.736133	1.02884
ALDH1A3	4920148	NM_000693	220	0.58942	0.705266	0.960274
ALDH1B1	2650204	NM_000692	219	1.87163	1.52496	0.809767
ALDH1B1	1240379	NM_000692	219	1.87146	0.453228	0.496668
ALDH1L2	4250411	NM_001034173	160428	1.0485	1.06272	1.25424
ALDH2	840253	NM_000690	217	1.14291	1.28404	1.39173
ALDH3A1	5560369	NM_000691	218	0.552711	0.999212	0.566705
ALDH3A2	460746	NM_001031806	224	0.613385	0.603753	0.733045
ALDH3A2	3120196	NM_001031806	224	0.607893	0.765816	0.821088
ALDH3A2	1690608	NM_000382	224	0.554156	0.413993	0.932505
ALDH3B1	2970356	NM_000694	221	1.04692	8.70838	1.51987
ALDH3B1	1850440	NM_000694	221	0.866271	1.04986	2.22469
ALDH3B2	2360201	NM_001031615	222	0.954853	0.8945	1.01435
ALDH3B2	4070647	NM_001031615	222	0.929636	0.770519	0.850688
ALDH4A1	1470427	NM_170726	8659	0.841612	0.396895	0.552344
ALDH4A1	160343	NM_003748	8659	0.821801	0.830687	0.280903
ALDH4A1	2640273	NM_003748	8659	0.736595	0.66073	0.61629
ALDH4A1	6220360	NM_170726	8659	0.725453	0.576482	0.834639
ALDH5A1	2640274	NM_001080	7915	0.695439	0.289217	0.713591
ALDH5A1	7040327	NM_001080	7915	0.663309	0.596588	0.835593
ALDH6A1	5820373	NM_005589	4329	1.1963	1.35326	1.78175
ALDH6A1	7100274	NM_005589	4329	1.11166	0.909839	0.923909
ALDH7A1	70102	NM_001182	501	0.574582	0.853004	0.579754
ALDH7A1	4150544	NM_001182	501	0.567479	0.444832	0.840827
ALDH8A1	2100546	NM_022568	64577	1.15334	1.19684	1.76081
ALDH9A1	1820044	NM_000696	223	0.726685	0.61904	0.812102
ALDOA	2640088	NM_184041	226	17.1221	24.3084	1.98394
ALDOA	2850255	NM_184043	226	1.38242	1.21115	0.798804
ALDOA	6590253	NM_184043	226	1.10251	1.96411	1.81352
ALDOA	2470341	NM_000034	226	0.929502	1.05399	1.21652
ALDOB	650427	NM_000035	229	1.50609	1.67696	1.29756
ALDOC	7330544	NM_005165	230	3.51545	1.39197	3.88075
ALG1	5560670	NM_019109	56052	2.00528	1.94141	0.501936
ALG10B	3060196	NM_001013620	144245	0.925548	0.867452	0.880971
ALG10B	1110241	NM_001013620	144245	0.743562	0.788254	0.810865
ALG11	4210358	NM_001004127	440138	1.40964	1.119	0.942384
ALG11	5550647	NM_001004127	440138	1.01173	1.06439	0.770695
ALG12	6940735	NM_024105	79087	0.755898	1.12873	1.24586
ALG13	6660411	NM_018466	79868	1.30051	1.26876	1.13658
ALG13	730520	NM_018466	55849	0.924266	0.934632	0.798507
ALG13	2230215	NM_001039210	79868	0.655468	1.1453	2.20807
ALG14	2340524	NM_144988	199857	0.988064	1.03451	0.669062
ALG14	50128	NM_144988	199857	0.923829	0.990979	0.94396
ALG1L	1440474	NM_001015050	200810	1.92401	1.52511	0.92215
ALG1L	2900681	NM_001015050	200810	1.74788	1.23137	1.43801
ALG2	1990021	NM_033087	85365	0.794899	0.56484	1.47191
ALG3	2650167	NM_005787	10195	0.845505	1.06114	0.843805
ALG5	6370113	NM_013338	29880	0.924823	0.592885	0.750603
ALG6	6960243	NM_013339	29929	0.728611	0.805216	0.885985
ALG8	2970296	NM_001007027	79053	0.900106	0.54707	0.738923
ALG8	4850632	NM_024079	79053	0.829517	0.773691	0.795763
ALG8	3610291	NM_001007027	79053	0.812836	0.841115	1.21953
ALG9	450204	NM_001077692	79796	1.01366	0.708401	1.28645
ALKBH1	1780020	NM_006020	8846	1.3592	1.45849	1.46492
ALKBH1	3360056	NM_006020	8846	0.896432	1.32651	0.868675
ALKBH1	7160167	NM_006020	8846	0.718402	1.09839	1.08745
ALKBH2	1340537	NM_001001655	121642	0.725427	1.15758	0.916716
ALKBH3	4610369	NM_139178	221120	1.02399	1.26112	0.913471
ALKBH4	1780379	NM_017621	54784	0.867608	1.50585	0.694648
ALKBH5	1400209	NM_017758	54890	1.2005	0.67753	1.38664
ALKBH6	670360	NM_198867	84964	1.29085	1.67371	1.27655
ALKBH7	3310324	NM_032306	84266	1.42405	3.11664	1.29417
ALKBH8	6420044	NM_138775	91801	0.934283	0.878145	0.739336
ALLC	4070601	NM_018436	55821	1.1994	1.2114	1.15981
ALMS1	5130736	NM_015120	7840	1.12688	0.885366	0.867393
ALOX12	6040259	NM_000697	239	1.53504	0.850976	0.865878
ALOX12B	7510671	NM_001139	242	1.75368	1.60229	1.58306
ALOX12P2	1770630	NR_002710	245	1.08773	1.07717	0.455985
ALOX15	1450719	NM_001140	246	1.56667	1.80999	1.13581
ALOX15	5220278	NM_001140	246	1.19258	2.47823	1.51608
ALOX15B	2900639	NM_001141	247	1.29742	0.871332	1.58127
ALOX15B	430152	NM_001141	247	1.04352	1.00951	1.2865
ALOX15B	5810154	NM_001039131	247	0.969164	0.798574	2.83499
ALOX5	2510037	NM_000698	240	0.83101	0.94496	0.883984
ALOX5AP	3930343	NM_001629	241	3.00448	3.86607	1.62347
ALOXE3	990685	NM_021628	59344	1.35731	0.883269	0.677512
ALPI	2570162	NM_001631	248	0.968152	0.909556	0.7921
ALPK1	540390	NM_025144	80216	0.8934	1.40083	1.46476
ALPK2	5270519	NM_052947	115701	0.900943	0.78333	0.828875
ALPP	2600133	NM_001632	250	0.818164	0.912852	1.51925
ALPPL2	2490376	NM_031313	251	0.955263	0.964519	1.03632
ALS2	2140156	NM_020919	57679	0.896072	0.699543	0.77335
ALS2CL	4570630	NM_147129	259173	1.08675	1.39545	0.584299
ALS2CL	4060037	NM_147129	259173	0.942918	1.24119	1.13932
ALS2CR12	2100626	NM_139163	130540	0.718895	0.533542	1.00066
ALS2CR4	50348	NM_001044385	65062	0.849893	0.606629	0.503622
ALS2CR8	2100286	NM_024744	79800	1.26074	1.38593	1.72156
ALX1	4210719	NM_006982	8092	1.02999	1.27528	0.931083
ALX3	6250762	NM_006492	257	0.945312	0.665907	1.07193
ALX3	3520619	NM_006492	257	0.873446	1.10582	0.888052
AMAC1	1690187	NM_152462	146861	0.639207	1.68397	0.693437
AMAC1L2	6400661	NM_054028	83650	0.947667	1.06556	1.43244
AMAC1L2	6550360	NM_054028	83650	0.942288	1.04075	0.696845
AMAC1L2	2600022	NM_054028	83650	0.875741	1.15366	1.00284
AMACR	3130154	NM_203382	23600	1.80006	0.963809	1.07224
AMACR	520544	NM_014324	23600	1.2288	1.11235	0.883262
AMACR	5870286	NM_203382	23600	0.91249	1.25883	0.903463
AMBN	6450037	NM_016519	258	0.833361	1.11759	0.906929
AMBN	6400438	NM_016519	258	0.76362	0.72843	0.797229
AMBP	4900433	NM_001633	259	1.04499	1.54468	0.975051
AMBRA1	1110129	NM_017749	55626	1.08998	0.92712	0.915
AMD1	3870619	NM_001634	262	4.47844	3.40911	0.834462
AMD1	50050	NM_001033059	262	0.84326	0.297288	0.883063
AMDHD1	6520112	NM_152435	144193	1.08863	1.66757	0.643277
AMDHD2	6110280	NM_015944	51005	1.00241	0.804064	0.568669
AMELX	5720730	NM_001142	265	1.47885	1.29585	0.657922
AMELY	7040402	NM_001143	266	1.37671	1.43848	1.31366
AMFR	4610594	NM_001144	267	1.88468	1.66211	0.948019
AMFR	1400672	NM_001144	267	1.50467	1.6978	1.05373
AMH	3780156	NM_000479	268	1.18579	1.20694	0.857046
AMHR2	5420152	NM_020547	269	1.30924	2.55478	1.55923
AMICA1	1580465	NM_153206	120425	0.71737	2.284	1.32492
AMIGO1	4730598	NM_020703	57463	1.17415	1.20222	0.898471
AMIGO2	7100053	NM_181847	347902	0.863724	0.566903	1.28927
AMIGO3	3060349	NM_198722	386724	0.912437	1.08031	1.01126
AMMECR1	7100093	NM_001025580	9949	1.93992	1.5557	1.01922
AMMECR1	450176	NM_015365	9949	1.36589	0.821485	0.566576
AMMECR1	2340601	NM_015365	9949	1.31724	0.911709	0.903327
AMMECR1L	4900605	NM_031445	83607	0.664052	0.661677	1.04113
AMN	1110706	NM_030943	81693	1.20733	1.11561	1.23686
AMOT	3290646	NM_133265	154796	0.649591	1.13591	1.46855
AMOTL2	6960079	NM_016201	51421	0.850683	0.905034	1.46567
AMPD1	6660114	NM_000036	270	1.08502	1.19453	1.18912
AMPD2	70296	NM_004037	271	1.19125	0.951161	0.598254
AMPD3	990576	NM_000480	272	1.12713	1.16166	1.263
AMPD3	150504	NM_000480	272	0.689818	1.24956	1.71767
AMPH	360402	NM_001635	273	1.22094	1.12953	0.939485
AMPH	4040152	NM_001635	273	1.04156	0.759677	0.625746
AMT	940450	NM_000481	275	0.889742	1.09422	1.20477
AMTN	7320450	NM_212557	401138	0.790367	0.771498	0.658064
AMY1A	1740220	NM_004038	276	1.13636	0.456113	1.35479
AMY1A	1030161	NM_001008221	276	1.10494	0.886998	1.29279
AMY1B	4070164	NM_001008218	277	1.58707	1.62317	0.690379
AMY1B	840500	NM_001008218	277	1.14323	1.32161	1.18719
AMY1B	5550288	NM_001008218	277	0.926365	0.677772	1.11872
AMY1C	1820068	NM_001008219	278	1.10922	0.718272	0.989594
AMY2A	1440403	NM_000699	279	1.01582	0.534248	0.743218
AMY2A	7380121	NM_000699	279	0.979936	0.826874	1.03103
AMY2A	2450347	NM_000699	279	0.967589	0.912677	1.04857
AMY2A	3130296	NM_000699	279	0.746891	0.753666	1.81036
AMY2B	4810176	NM_020978	280	1.21995	1.0846	1.1557
AMY2B	7000754	NM_020978	280	0.73839	0.718957	1.47531
AMZ1	4730402	NM_133463	155185	0.867321	0.875493	1.38659
AMZ2	510328	NM_001033569	51321	1.17858	1.49932	1.39752
AMZ2	270739	NM_001033574	51321	1.03753	0.917476	0.954327
ANAPC1	7210259	NM_022662	64682	1.27254	0.602009	1.21518
ANAPC1	730647	NM_022662	64682	0.820712	0.587399	0.797376
ANAPC10	6840706	NM_014885	10393	1.11666	1.22471	1.26368
ANAPC11	4540162	NM_001002244	51529	1.00487	1.3583	1.138
ANAPC11	4760288	NM_001002246	51529	0.932669	1.30646	0.903096
ANAPC11	10220	NM_001002246	51529	0.865858	0.456886	0.662101
ANAPC13	6250382	NM_015391	25847	0.869335	1.23131	0.708777
ANAPC16	7210300	NM_173473	119504	0.991795	1.24918	0.903638
ANAPC2	3870424	NM_013366	29882	0.960011	1.53154	1.00055
ANAPC2	4180634	NM_013366	29882	0.76045	1.78745	0.692843
ANAPC4	6450021	NM_013367	29945	0.620098	0.939377	0.86775
ANAPC5	4730408	NM_016237	51433	0.635247	0.765826	0.902851
ANAPC7	160220	NM_016238	51434	3.0637	2.39368	0.592406
ANG	3890484	NM_001097577	283	1.73493	1.68793	1.4051
ANG	3930392	NM_001097577	283	1.69882	1.5607	2.2011
ANGEL1	5550086	NM_015305	23357	0.799301	0.673831	0.989056
ANGEL2	1820441	NM_144567	90806	0.749724	0.598354	1.02748
ANGPT1	3120326	NM_001146	284	1.29701	1.37011	1.41165
ANGPT1	3360066	NM_001146	284	1.20604	0.898439	1.20474
ANGPT2	3450066	NM_001147	285	1.35203	1.4077	0.78008
ANGPTL2	7650672	NM_012098	23452	1.29177	1.19917	1.02242
ANGPTL3	1050561	NM_014495	27329	0.934773	0.935207	1.13437
ANGPTL4	4610433	NM_139314	51129	19.9715	4.57475	1.92859
ANGPTL4	2450592	NM_001039667	51129	2.00339	1.77084	1.98729
ANGPTL4	990092	NM_139314	51129	1.17758	0.96198	1.33223
ANGPTL5	2360066	NM_178127	253935	1.53013	1.32733	1.00966
ANGPTL6	5050707	NM_031917	83854	1.68422	4.05559	2.29315
ANK1	2900402	NM_020475	286	2.23225	2.43192	0.573282
ANK1	3180209	NM_020478	286	1.62416	1.7923	1.16584
ANK3	2630600	NM_020987	288	1.40841	1.24392	1.08268
ANK3	1450672	NM_001149	288	0.904561	1.05574	0.910274
ANK3	1850709	NM_001149	288	0.596988	0.924819	1.37454
ANKAR	1430563	NM_144708	150709	1.09684	1.24402	0.547745
ANKAR	110707	NM_144708	150709	0.759294	1.48305	1.35419
ANKDD1A	5890564	NM_182703	348094	1.08192	1.00659	1.43708
ANKFN1	6590152	NM_153228	162282	1.0268	1.20235	0.87897
ANKFY1	6980639	NM_016376	51479	1.03842	0.828854	1.00436
ANKFY1	6220152	NM_020740	51479	0.994397	1.14368	1.62953
ANKFY1	450300	NM_016376	51479	0.560115	0.424822	0.759777
ANKH	5130274	NM_054027	56172	0.903625	0.896143	1.02616
ANKHD1	7150026	NM_017978	54882	1.21385	1.04793	0.649655
ANKHD1	6380100	NM_024668	54882	1.13334	0.850702	1.0522
ANKHD1	610546	NM_017747	54882	0.871255	1.08917	1.25964
ANKHD1-EIF4EBP3	520008	NM_020690	404734	0.557059	0.849971	1.19921
ANKLE1	1050440	NM_152363	126549	1.70005	0.873471	0.647529
ANKLE1	4670554	NM_152363	126549	0.717434	0.460596	0.934247
ANKMY1	6200358	NM_016552	51281	0.890687	0.901697	3.7499
ANKMY1	2970068	NM_017844	51281	0.848649	0.833908	1.42712
ANKMY1	2760102	NM_017844	51281	0.605889	0.599494	0.953132
ANKMY2	4890136	NM_020319	57037	1.02207	2.12769	0.965077
ANKRA2	1170630	NM_023039	57763	1.67275	1.92142	1.4783
ANKRA2	7400114	NM_023039	57763	1.44902	0.841236	1.43986
ANKRD1	6560112	NM_014391	27063	0.875287	1.0097	1.11402
ANKRD10	6900674	NM_017664	55608	0.678957	0.625809	1.17433
ANKRD10	4540689	NM_017664	55608	0.661169	0.356878	1.2346
ANKRD11	3370274	NM_013275	29123	0.92561	0.538538	1.4159
ANKRD11	5890403	NM_013275	29123	0.765391	0.957139	0.480562
ANKRD12	7040132	NM_015208	23253	1.18733	1.44148	1.07119
ANKRD13A	2120224	NM_033121	88455	0.629686	0.476003	0.728796
ANKRD13B	5910273	NM_152345	124930	0.824473	0.842089	0.965004
ANKRD13C	4810053	NM_030816	81573	1.18618	1.00797	1.09497
ANKRD13D	4060451	NM_207354	338692	1.10492	1.04009	0.498768
ANKRD16	650008	NM_019046	54522	1.03514	0.749204	0.830711
ANKRD16	3450274	NM_001009941	54522	0.836029	0.833592	0.962062
ANKRD17	3130156	NM_032217	26057	1.76322	3.04705	0.935961
ANKRD17	4210437	NM_198889	26057	0.863739	1.34652	0.845801
ANKRD17	6940520	NM_198889	26057	0.804508	1.16291	0.86937
ANKRD20A1	7050114	NM_032250	84210	1.11238	1.22249	0.951127
ANKRD20A1	4290364	NM_032250	84210	0.944269	0.99818	2.05246
ANKRD20A1	6450661	NM_032250	84210	0.941037	1.35262	1.12099
ANKRD20A1	4490484	NM_032250	84210	0.850905	1.17959	0.954544
ANKRD20A3	5260703	NM_001012419	441425	1.22183	0.794691	0.996121
ANKRD20A3	4180609	NM_001012419	441425	1.01451	0.95509	1.45526
ANKRD20A8P	2260372	NR_003366	729171	1.03635	0.918452	0.486275
ANKRD20A8P	7510500	NR_003366	729171	0.974736	1.43436	2.0922
ANKRD20A8P	6480523	NR_003366	729171	0.66324	0.694226	0.387436
ANKRD22	130181	NM_144590	118932	0.778722	0.78598	0.545872
ANKRD22	4150270	NM_144590	118932	0.752422	0.773175	1.05084
ANKRD23	3520195	NM_144994	200539	0.873481	0.917663	1.08741
ANKRD23	1300634	NM_144994	200539	0.692593	1.1489	0.802424
ANKRD24	6280551	NM_133475	170961	1.21754	1.23025	0.932659
ANKRD24	3460626	NM_133475	170961	0.659337	0.889314	1.27833
ANKRD27	5670112	NM_032139	84079	1.28541	0.74314	0.698814
ANKRD28	2760563	NM_015199	23243	0.73711	0.871801	1.74077
ANKRD28	360064	NM_015199	23243	0.723811	0.809488	1.1418
ANKRD29	1500358	NM_173505	147463	0.768735	0.588292	0.810717
ANKRD32	6380747	NM_032290	84250	0.769268	0.419966	0.693888
ANKRD32	1070736	NM_032290	84250	0.765846	0.499075	0.657105
ANKRD33	4860707	NM_182608	341405	0.761525	0.750677	0.801595
ANKRD34A	1090142	NM_001039888	284615	0.604592	1.08076	1.13066
ANKRD34B	3390451	NM_001004441	340120	1.23165	0.889352	0.875083
ANKRD35	4590377	NM_144698	148741	1.14308	1.45036	0.645682
ANKRD35	4180437	NM_144698	148741	0.922108	1.16274	0.830156
ANKRD36B	3060010	NM_025190	57730	1.36099	1.22508	1.87248
ANKRD36B	6100066	NM_025190	57730	0.685355	0.66619	0.917631
ANKRD37	240682	NM_181726	353322	4.55615	26.0875	5.79393
ANKRD39	6220553	NM_016466	51239	0.78913	1.67653	0.787841
ANKRD42	2120392	NM_182603	338699	0.716325	0.743035	0.781438
ANKRD43	2450274	NM_175873	134548	0.962341	0.817179	1.44959
ANKRD44	520280	NM_153697	91526	0.967102	0.938068	1.73722
ANKRD44	5810228	NM_153697	91526	0.89834	0.906383	1.13668
ANKRD46	2750598	NM_198401	157567	0.752779	0.560761	0.904736
ANKRD49	520341	NM_017704	54851	0.891579	1.41338	0.871742
ANKRD5	290450	NM_022096	63926	1.06245	0.845478	1.66653
ANKRD5	1740546	NM_022096	63926	0.620144	0.876836	1.87629
ANKRD50	1770187	NM_020337	57182	0.640095	0.497512	1.0106
ANKRD53	150097	NM_024933	79998	0.627752	0.872824	1.02756
ANKRD54	2340598	NM_138797	129138	0.505171	0.292608	0.813388
ANKRD55	5340451	NM_024669	79722	0.799674	0.818537	0.953875
ANKRD56	2190673	NM_001029870	345079	0.980752	1.15833	2.68874
ANKRD57	2510224	NM_023016	65124	2.9906	2.80344	1.68083
ANKRD6	2030014	NM_014942	22881	1.12252	1.33237	0.609014
ANKRD6	4880465	NM_014942	22881	0.83594	0.96474	0.998451
ANKRD60	4040053	XM_001134462	140731	1.08865	1.19668	1.67146
ANKRD9	4730767	NM_152326	122416	1.03416	1.56734	0.992737
ANKRD9	7050370	NM_152326	122416	0.946434	0.957972	1.00946
ANKS1A	5390064	NM_015245	23294	0.693946	0.684656	1.16759
ANKS1B	6660463	NM_020140	56899	1.25737	1.64688	1.65617
ANKS3	6510445	NM_133450	124401	0.909219	0.833379	0.917117
ANKS4B	1110382	NM_145865	257629	0.958344	1.06998	0.785156
ANKS6	1050400	NM_173551	203286	0.683382	0.719087	0.991949
ANKZF1	580598	NM_001042410	55139	1.56188	0.652099	3.12142
ANKZF1	5090475	NM_018089	55139	1.52725	0.77317	1.96371
ANKZF1	5050364	NM_018089	55139	0.869427	0.77192	1.62553
ANLN	6450669	NM_018685	54443	0.79804	0.382631	0.979336
ANO1	6420025	NM_018043	55107	0.84052	0.777723	0.883681
ANO1	6400274	NM_018043	55107	0.707565	0.715184	1.06351
ANO10	7040554	NM_018075	55129	0.646168	1.19392	0.997964
ANO3	4900768	NM_031418	63982	0.602713	0.893136	1.03878
ANO6	7040674	NM_001025356	196527	1.04412	0.851023	0.942285
ANO7	6020008	NM_001001891	50636	0.842224	0.930343	1.39785
ANO8	2900438	NM_020959	57719	0.792042	1.19553	1.44779
ANO9	3400121	NM_001012302	338440	1.10364	1.6779	0.782583
ANO9	2750711	NM_001012302	338440	1.08344	1.39635	1.22143
ANO9	5720373	NM_001012302	338440	0.863854	1.77514	1.44789
ANP32A	1240424	NM_006305	8125	1.62556	0.429063	0.723346
ANP32B	3850053	NM_006401	10541	0.806688	0.759786	0.895896
ANP32C	6980328	NM_012403	23520	2.73684	1.3186	0.705636
ANP32C	1230725	NM_012403	23520	1.02004	1.19946	0.736506
ANP32E	1070632	NM_030920	81611	1.02835	1.21067	0.79735
ANPEP	5810612	NM_001150	290	0.328899	0.469045	1.02763
ANTXR1	20647	NM_032208	84168	1.11358	1.08157	1.18773
ANTXR1	3120689	NM_053034	84168	0.683279	0.610683	0.94407
ANTXR1	60255	NM_018153	84168	0.665915	0.830848	0.699974
ANTXR2	10685	NM_058172	118429	0.774368	0.620875	1.2742
ANUBL1	3840653	NM_174890	93550	0.610368	0.677307	0.309476
ANXA1	6520215	NM_000700	301	0.973677	1.00829	1.07174
ANXA11	5900735	NM_001157	311	1.0054	0.877812	1.03899
ANXA11	1300274	NM_001157	311	0.898493	0.765076	0.902762
ANXA11	6960594	NM_145869	311	0.81738	0.91023	1.73573
ANXA13	1030184	NM_004306	312	0.69707	0.850166	0.577184
ANXA2	770730	NM_001002857	302	2.36399	1.8201	0.748404
ANXA2	4780615	NM_001002858	302	1.0539	1.19125	0.931894
ANXA2	3520328	NM_001002857	302	0.935023	0.859558	0.99788
ANXA2P1	3370202	NR_001562	303	1.10231	0.560617	0.829196
ANXA2P1	270609	NR_001562	303	1.01252	0.776545	0.6609
ANXA2P3	2810411	NR_001446	305	0.824046	0.590812	0.923306
ANXA3	240594	NM_005139	306	1.88927	2.64822	0.977095
ANXA4	3440079	NM_001153	307	1.20284	1.49488	0.850315
ANXA5	1070451	NM_001154	308	0.653939	0.804386	0.980232
ANXA6	2490598	NM_001155	309	0.652864	0.648778	0.761457
ANXA7	6180671	NM_004034	310	1.41835	1.15165	1.02504
ANXA7	6330044	NM_004034	310	0.83987	0.693166	0.565593
ANXA8	2490682	NM_001040084	653145	1.18587	0.934834	0.736534
ANXA8L2	7330132	NM_001630	244	1.06424	1.19974	1.23559
ANXA8L2	1400711	NM_001630	244	0.872737	1.04702	0.75298
ANXA9	1260100	NM_003568	8416	1.29471	1.04443	1.22869
AOAH	2940424	NM_001637	313	0.892414	0.821451	1.25563
AOC2	580736	NM_009590	314	1.33774	1.26303	0.51801
AOC2	4230307	NM_001158	314	1.12676	1.18231	0.959263
AOC2	4290180	NM_001158	314	1.12378	1.15701	0.648363
AOC3	6860309	NM_003734	8639	1.01417	1.5203	1.21955
AOC4	7380390	NR_002773	90586	0.81814	1.37037	1.76585
AOX1	3780095	NM_001159	316	1.15265	1.06113	0.884372
AOX2P	5290487	NR_001557	344454	0.905236	0.998345	1.5046
AP1AR	3710753	NM_018569	55435	1.14299	0.785238	0.827638
AP1AR	1450239	NM_018569	55435	0.768499	0.570175	0.484572
AP1B1	730301	NM_145730	162	0.63254	1.18192	1.24596
AP1G1	1820136	NM_001128	164	2.63653	1.7613	0.939432
AP1G1	1850593	NM_001128	164	2.19646	1.66876	1.05191
AP1G2	7400468	NM_003917	8906	0.768376	1.82957	1.40001
AP1M1	2190241	NM_032493	8907	0.867169	0.561112	1.00683
AP1M2	1170041	NM_005498	10053	0.81318	0.809397	1.40102
AP1S1	7040079	NM_001283	1174	3.93529	3.55881	0.640741
AP1S2	940706	NM_003916	8905	1.45408	1.56978	1.38012
AP1S2	1070192	NM_003916	8905	1.31817	0.98955	0.991415
AP1S3	4480491	NM_001039569	130340	0.851053	0.842498	2.11906
AP2A1	4390180	NM_130787	160	1.17063	1.50777	0.642684
AP2A1	1660072	NM_130787	160	0.584887	1.10635	1.0714
AP2A2	6270041	NM_012305	161	0.814067	0.769314	0.978505
AP2B1	2340451	NM_001282	163	1.4942	3.35068	0.791541
AP2B1	1400605	NM_001282	163	1.24384	2.24606	1.11821
AP2M1	840148	NM_004068	1173	1.03812	1.59621	1.00847
AP2M1	240187	NM_004068	1173	0.94788	1.65051	0.79291
AP2S1	3120228	NM_004069	1175	1.46583	1.2235	0.832226
AP2S1	6370661	NM_004069	1175	0.791012	0.859981	0.869362
AP3B1	2230603	NM_003664	8546	0.945855	0.671313	0.938416
AP3B2	4230360	NM_004644	8120	1.20061	0.968541	0.513402
AP3D1	1050053	NM_001077523	8943	1.07151	0.931874	1.00532
AP3D1	6100719	NM_001077523	8943	0.694439	0.467078	1.20739
AP3D1	4210612	NM_003938	8943	0.674702	0.491091	0.943451
AP3M1	6200437	NM_207012	26985	0.915689	0.928425	1.2435
AP3M1	2760202	NM_012095	26985	0.838352	0.576495	1.04895
AP3M2	3420128	NM_006803	10947	0.413145	0.400326	0.85212
AP3S2	2750286	NM_005829	10239	0.645721	0.66532	0.867868
AP4B1	510129	NM_006594	10717	0.637242	0.675649	0.9543
AP4E1	270343	NM_007347	23431	0.704459	0.391284	0.72253
AP4M1	2750168	NM_004722	9179	0.754198	1.24449	0.971742
AP4S1	2970669	NM_007077	11154	1.06045	1.34699	0.857049
APAF1	2760082	NM_181869	317	0.984812	1.04052	1.37833
APAF1	1820324	NM_013229	317	0.829444	0.581001	1.18343
APBA2	3710053	NM_005503	321	0.9601	1.22977	1.0978
APBA3	4070014	NM_004886	9546	0.814856	1.28964	1.04721
APBB1	4570592	NM_145689	322	2.32645	1.34731	0.932754
APBB1	1340040	NM_145689	322	1.17101	1.0769	1.03496
APBB1IP	1820722	NM_019043	54518	0.287066	0.441217	1.62232
APBB2	990392	NM_173075	323	1.41919	1.45444	1.35861
APBB3	7320402	NM_133173	10307	1.95946	1.30432	1.32353
APBB3	4120279	NM_133172	10307	1.81633	1.37802	1.99008
APC	5720722	NM_000038	324	0.827729	1.07713	1.55062
APC2	4180358	NM_005883	10297	1.03917	1.01822	0.978831
APCDD1	4280739	NM_153000	147495	0.942597	1.2962	1.12123
APCDD1L	130138	NM_153360	164284	0.817546	1.17251	1.42891
APCS	3460279	NM_001639	325	0.931117	0.894398	1.63944
APEH	450475	NM_001640	327	0.620541	0.47204	0.722557
APEX1	3120309	NM_001641	328	0.773222	0.765411	1.11677
APEX1	6510053	NM_080649	328	0.650426	0.909863	1.04457
APEX2	1430047	NM_014481	27301	0.811311	0.890266	0.675492
APH1A	7550364	NM_001077628	51107	1.25053	1.20573	1.09866
APH1A	1850221	NM_001077628	51107	1.23108	2.08861	0.94045
APH1B	7160224	NM_031301	83464	1.41009	1.19502	1.24492
API5	7050523	NM_006595	8539	0.725459	1.07885	0.812244
APIP	6200202	NM_015957	51074	1.43424	0.863095	0.766358
APIP	7380010	NM_015957	51074	1.11294	0.554125	0.686991
APLF	7550673	NM_173545	200558	0.861024	0.878657	1.42043
APLN	7200427	NM_017413	8862	1.27733	1.64989	2.6584
APLP1	3140431	NM_005166	333	1.11257	1.26369	0.696431
APLP1	7000008	NM_001024807	333	1.07128	1.32573	0.965464
APLP2	3450577	NM_001642	334	0.649429	1.36336	1.26538
APOA1	4570364	NM_000039	335	0.57418	0.899922	1.11083
APOA1BP	1570725	NM_144772	128240	0.866916	0.743006	0.585135
APOA2	6380020	NM_001643	336	2.20841	1.56505	0.902248
APOBEC2	3890743	NM_006789	10930	0.679957	0.632234	1.50094
APOBEC3A	7330671	NM_145699	200315	0.931644	1.21207	0.889951
APOBEC3B	3170068	NM_004900	9582	5.08504	4.6698	0.508906
APOBEC3C	3120221	NM_014508	27350	3.22712	5.95237	1.38135
APOBEC3D	6350402	NM_152426	140564	0.732113	0.914617	1.54947
APOBEC3F	610379	NM_001006666	200316	1.77159	1.28118	1.04458
APOBEC3F	1410279	NM_001006666	200316	1.39185	0.796022	0.971466
APOBEC3F	6290743	NM_145298	200316	1.27612	1.96938	1.31719
APOBEC3F	5340403	NM_145298	200316	0.893546	1.3932	1.02249
APOBEC3G	4120369	NM_021822	60489	2.5661	3.33705	1.99555
APOBEC3G	1190026	NM_021822	60489	2.41958	3.08164	1.21021
APOBEC3H	160292	NM_181773	164668	4.51752	3.6278	1.31149
APOBR	6250241	NM_018690	55911	1.47601	5.16457	1.26112
APOC1	3830465	NM_001645	341	1.74923	4.33795	0.889792
APOC2	3800403	NM_000483	344	1.71034	3.3799	1.38426
APOC3	2630010	NM_000040	345	1.2624	1.02484	0.752154
APOC4	3440717	NM_001646	346	0.75941	0.902846	1.39962
APOD	7150634	NM_001647	347	0.866367	4.75869	1.61946
APOE	730414	NM_000041	348	1.82129	3.34399	1.21808
APOF	130400	NM_001638	319	0.963318	0.66498	1.14058
APOL1	4040386	NM_145343	8542	0.866015	1.0643	1.35425
APOL2	4880291	NM_145637	23780	1.03917	0.923294	1.03165
APOL2	4040270	NM_030882	23780	0.583865	0.545759	0.790495
APOL2	1570358	NM_145637	23780	0.525865	0.85656	0.822305
APOL3	4900102	NM_145641	80833	1.13243	1.12518	1.08266
APOL3	1980750	NM_145641	80833	0.722358	0.413739	0.981124
APOL4	3400142	NM_030643	80832	1.29594	1.21802	0.939624
APOL4	610661	NM_145660	80832	1.00152	1.40862	2.11631
APOL6	5550397	NM_030641	80830	1.03157	1.14493	1.89781
APOLD1	1770364	NM_030817	81575	1.18061	1.08726	1.83324
APOM	3830022	NM_019101	55937	0.831541	1.47435	0.947695
APOO	2690132	NM_024122	79135	1.04752	0.859368	0.605201
APP	650110	NM_201414	351	2.26294	1.79539	0.968809
APP	3370577	NM_201414	351	1.33155	1.30526	1.35975
APP	1190735	NM_000484	351	0.766977	0.76488	0.778559
APPBP2	1440707	NM_006380	10513	1.43453	1.13852	1.51573
APPBP2	5270333	NM_006380	10513	0.731112	0.692765	1.06373
APPL1	5860554	NM_012096	26060	0.548109	0.542396	0.98911
APPL2	4180100	NM_018171	55198	0.747007	0.789681	0.571964
APRT	6510603	NM_000485	353	0.925405	1.25686	0.840241
APRT	160746	NM_000485	353	0.87764	0.91624	0.72346
APTX	1570138	NM_175069	54840	0.856111	0.347842	1.05597
AQP1	70338	NM_198098	358	0.876571	0.741487	0.893157
AQP1	450619	NM_198098	358	0.825708	0.908896	0.983004
AQP10	2340577	NM_080429	89872	3.04979	6.62357	1.28484
AQP12A	7150706	NM_198998	375318	0.802516	0.865021	1.15659
AQP2	4480079	NM_000486	359	1.07481	1.70837	1.1363
AQP3	1050040	NM_004925	360	0.975681	1.07652	1.52286
AQP4	2070161	NM_001650	361	1.1923	1.07175	1.08864
AQP5	2810543	NM_001651	362	1.34784	1.14239	0.905886
AQP6	4490678	NM_001652	363	0.691301	0.973907	0.8233
AQP8	2470064	NM_001169	343	1.14935	1.34562	1.23949
AQP9	160494	NM_020980	366	0.917411	1.51377	0.764318
AQPEP	6400754	NM_173800	206338	1.23425	0.916779	1.11816
AQR	1070546	NM_014691	9716	0.798888	0.45547	0.703004
AQR	2690639	NM_014691	9716	0.680772	1.3315	0.685415
AR	6900072	NM_001011645	367	1.43152	1.42093	0.824682
AR	3710017	NM_000044	367	0.840154	1.29206	0.38839
AR	2000494	NM_001011645	367	0.793289	0.91498	1.03109
ARAF	2100576	NM_001654	369	1.14733	0.794961	1.40521
ARAP1	460747	NM_015242	116985	1.81114	1.7994	1.30787
ARAP3	7380255	NM_022481	64411	1.15162	0.749058	1.10357
ARC	430674	NM_015193	23237	0.830861	1.09185	0.647835
ARCN1	2750653	NM_001655	372	1.16835	1.36979	1.0145
AREG	6520600	NM_001657	374	0.685614	0.868746	0.488172
ARF1	1430259	NM_001024228	375	1.11343	1.65638	1.20687
ARF1	5550491	NM_001024226	375	0.91013	0.946339	1.12085
ARF1	3310139	NM_001024227	375	0.878229	1.05417	0.923451
ARF3	2680446	NM_001659	377	1.19157	0.349626	0.860293
ARF4	1430136	NM_001660	378	3.5021	3.96585	0.974983
ARF4	6770176	NM_001660	378	1.09142	1.13509	0.93989
ARF5	3370189	NM_001662	381	1.2486	1.12082	1.07491
ARF6	510300	NM_001663	382	0.729943	0.84716	1.01485
ARFGAP1	2710209	NM_175609	55738	0.915266	1.64734	0.776197
ARFGAP1	5900445	NM_018209	55738	0.756226	0.648789	1.14358
ARFGAP2	3190066	NM_032389	84364	0.650146	1.28513	1.04641
ARFGAP3	5090056	NM_014570	26286	1.09661	0.791876	1.21315
ARFGAP3	3850639	NM_014570	26286	0.997228	1.13166	0.574102
ARFGEF1	6100524	NM_006421	10565	1.06857	1.20257	1.15374
ARFGEF1	3710681	NM_006421	10565	0.834035	0.671685	0.98697
ARFGEF2	3610554	NM_006420	10564	0.784234	0.770481	0.806305
ARFIP1	10753	NM_001025593	27236	1.25804	0.94921	1.07619
ARFIP1	4220484	NM_001025595	27236	1.12247	0.707031	0.855269
ARFIP1	2060630	NM_001025593	27236	0.396462	1.03294	1.82559
ARFIP2	870082	NM_012402	23647	0.705713	0.709824	1.05048
ARFRP1	6110520	NM_003224	10139	0.728484	0.631523	0.714978
ARG1	5270753	NM_000045	383	0.844271	0.990099	1.44853
ARG2	5720725	NM_001172	384	2.1083	8.81494	2.7634
ARGFX	7330307	NM_001012659	503582	0.914058	0.844453	0.875755
ARGFXP2	2340537	NR_002222	503640	1.01964	0.946498	1.83063
ARGLU1	4880132	NM_018011	55082	0.925842	0.881473	1.04842
ARHGAP1	6480082	NM_004308	392	0.864864	0.506452	0.919764
ARHGAP10	2000669	NM_024605	79658	0.465535	0.532591	0.935356
ARHGAP11A	4180537	NM_199357	9824	1.32485	1.09464	0.967412
ARHGAP11A	990121	NM_014783	9824	0.9408	1.06221	0.781915
ARHGAP11B	6060050	NM_001039841	89839	2.0195	1.76716	1.83264
ARHGAP12	5340747	NM_018287	94134	1.01863	0.926075	2.15532
ARHGAP12	5490612	NM_018287	94134	0.950759	1.25781	1.01536
ARHGAP17	6590564	NM_001006634	55114	1.15538	0.842947	1.0582
ARHGAP17	160561	NM_018054	55114	0.719266	0.555706	1.16328
ARHGAP17	3170520	NM_018054	55114	0.658345	0.722218	0.783293
ARHGAP18	3140445	NM_033515	93663	1.68856	1.94153	0.902926
ARHGAP19	6110332	NM_032900	84986	1.11037	0.903579	1.22566
ARHGAP20	6480593	NM_020809	57569	0.612136	0.959107	1.23075
ARHGAP21	1260543	NM_020824	57584	1.0682	0.35659	1.00274
ARHGAP22	510520	NM_021226	58504	1.22482	0.514531	1.02665
ARHGAP24	130008	NM_001042669	83478	1.30257	1.17931	0.886962
ARHGAP24	4290243	NM_031305	83478	1.04278	1.35147	1.59242
ARHGAP24	10239	NM_031305	83478	1.0354	0.864935	1.4525
ARHGAP24	2260538	NM_001025616	83478	0.588778	0.921546	0.940262
ARHGAP25	6520196	NM_014882	9938	0.795971	0.659049	0.939164
ARHGAP25	3850148	NM_014882	9938	0.584343	0.949331	1.53738
ARHGAP26	6350706	NM_015071	23092	1.16296	1.08095	1.58273
ARHGAP27	1260239	NM_199282	201176	0.790989	0.99622	1.09461
ARHGAP28	5810458	NM_001010000	79822	1.70292	1.6643	12.8187
ARHGAP28	510575	NM_001010000	79822	1.1608	1.30416	0.701163
ARHGAP29	7000390	NM_004815	9411	0.828204	0.667661	1.3746
ARHGAP30	7650747	NM_001025598	257106	3.83741	5.78124	1.79284
ARHGAP30	4390441	NM_181720	257106	1.87494	2.41384	1.58487
ARHGAP31	2060543	NM_020754	57514	0.894317	0.753622	1.07394
ARHGAP32	1340288	NM_014715	9743	0.84507	0.73697	0.749282
ARHGAP33	60167	NM_052948	115703	1.27798	3.09974	1.87728
ARHGAP39	4850300	NM_025251	80728	1.45249	9.85148	1.54376
ARHGAP4	7200240	NM_001666	393	0.749159	0.656523	0.756013
ARHGAP44	110575	NM_014859	9912	1.02436	0.991516	0.940831
ARHGAP5	2570605	NM_001173	394	0.597174	0.320758	1.69671
ARHGAP6	3130646	NM_013423	395	1.21761	1.12477	1.0309
ARHGAP8	60551	NM_181335	23779	0.959214	0.865444	0.767341
ARHGAP9	2650594	NM_001080156	64333	0.98932	1.43487	1.34869
ARHGAP9	110180	NM_001080157	64333	0.735491	0.561749	1.02435
ARHGDIA	4760255	NM_004309	396	0.56808	0.818752	0.620112
ARHGDIB	1570193	NM_001175	397	0.753736	0.864149	0.763194
ARHGDIG	4180377	NM_001176	398	0.910686	0.874524	1.15078
ARHGDIG	6650653	NM_001176	398	0.745848	1.01642	0.839332
ARHGEF1	3180736	NM_199002	9138	1.53013	2.05228	0.876959
ARHGEF1	2490672	NM_199002	9138	1.49182	1.48881	1.03842
ARHGEF1	870324	NM_004706	9138	1.21866	1.4778	1.20763
ARHGEF10	6900703	NM_014629	9639	0.77976	0.596986	0.924027
ARHGEF10L	70048	NM_018125	55160	0.987878	0.734707	1.18604
ARHGEF10L	730561	NM_018125	55160	0.919627	1.17386	0.87491
ARHGEF10L	5550170	NM_001011722	55160	0.893123	1.02479	2.34022
ARHGEF11	2510594	NM_198236	9826	0.928491	1.0845	1.1648
ARHGEF11	6520594	NM_014784	9826	0.69012	0.578911	0.930816
ARHGEF11	7150070	NM_014784	9826	0.659313	0.533675	0.860538
ARHGEF12	5270193	NM_015313	23365	0.986179	1.16086	0.979943
ARHGEF15	3610601	NM_173728	22899	1.33074	1.26622	0.85362
ARHGEF16	1030753	NM_014448	27237	1.20858	0.82508	1.47873
ARHGEF17	1660020	NM_014786	9828	0.578364	0.779203	1.24275
ARHGEF18	6130725	NM_015318	23370	0.753457	0.56493	1.1417
ARHGEF19	6250546	NM_153213	128272	0.678237	0.941421	1.08024
ARHGEF2	4120411	NM_004723	9181	0.862804	0.919837	1.1901
ARHGEF25	4050131	NM_182947	115557	1.35462	1.1613	1.04951
ARHGEF25	4670112	NM_182947	115557	1.19893	1.37551	1.03881
ARHGEF3	6250435	NM_019555	50650	0.875108	0.847396	1.01716
ARHGEF35	1030646	NM_001003702	445328	0.944447	1.56371	1.66575
ARHGEF37	5900367	NM_001001669	389337	1.50296	1.31252	0.638543
ARHGEF38	2710280	NM_017700	54848	1.07143	1.14189	0.452962
ARHGEF4	3850333	NM_015320	50649	1.78914	1.5636	0.625761
ARHGEF4	6250370	NM_032995	50649	0.613174	1.00404	0.377711
ARHGEF40	7320274	NM_018071	55701	0.751729	0.722006	1.07935
ARHGEF5	4150356	NM_005435	7984	1.04177	2.34504	1.29456
ARHGEF6	770703	NM_004840	9459	1.21185	0.806377	1.33097
ARHGEF7	2320445	NM_003899	8874	1.43226	1.01415	0.867883
ARHGEF7	1430379	NM_145735	8874	1.23023	0.912925	1.31232
ARHGEF7	510554	NM_003899	8874	1.05895	0.578677	1.14012
ARHGEF7	5340484	NM_145735	8874	0.970698	1.01026	1.33405
ARHGEF9	1070196	NM_015185	23229	1.01432	1.41916	1.01713
ARID1A	6280411	NM_139135	8289	1.14794	1.53621	1.39663
ARID1A	2030471	NM_006015	8289	0.507057	1.30165	1.07915
ARID2	4920463	NM_152641	196528	0.909005	0.829716	1.2494
ARID2	7100044	NM_152641	196528	0.812614	0.44062	0.56194
ARID3A	6510553	NM_005224	1820	0.840287	1.13149	0.920727
ARID3B	5960670	NM_006465	10620	0.966457	1.50096	1.28793
ARID3C	3120634	NM_001017363	138715	0.90166	0.806916	1.34631
ARID4A	2510368	NM_023000	5926	1.7387	1.35192	1.2437
ARID4A	2600402	NM_002892	5926	1.69429	2.22268	0.833466
ARID4A	7160440	NM_023001	5926	1.06465	1.20616	1.16092
ARID4B	2940722	NM_016374	51742	2.05036	1.17112	1.66466
ARID4B	6590722	NM_016374	51742	1.12585	1.19655	1.38175
ARID5A	4850014	NM_212481	10865	1.37814	1.17661	1.1634
ARID5A	7200301	NM_212481	10865	0.977612	0.898945	1.26381
ARID5A	160554	NM_212481	10865	0.924058	1.33599	1.59437
ARID5B	1410408	NM_032199	84159	1.02159	0.529578	1.15102
ARIH1	6560433	NM_005744	25820	1.15817	1.08776	1.01123
ARIH2	1010682	NM_006321	10425	0.77426	0.496496	0.782468
ARL1	4860468	NM_001177	400	0.746369	0.6591	0.885804
ARL10	5270053	NM_173664	285598	1.38688	0.919787	0.657904
ARL11	3360138	NM_138450	115761	1.00228	0.913282	0.977116
ARL13A	4730291	NM_001012990	392509	1.00352	1.35403	1.14655
ARL13B	5050471	NM_182896	200894	1.26937	1.15014	0.626928
ARL13B	4480722	NM_144996	200894	0.995602	0.857819	0.962326
ARL14	3400209	NM_025047	80117	0.906758	1.3405	1.07839
ARL15	5670494	NM_019087	54622	1.57206	1.00671	0.773515
ARL15	2140605	NM_019087	54622	0.923221	0.74052	1.35836
ARL16	7050500	NM_001040025	339231	1.17406	0.282901	0.938186
ARL16	990154	NM_001040025	339231	0.913291	1.60316	1.52278
ARL17A	6560307	NM_016632	51326	0.767334	0.708157	0.949053
ARL17B	4050603	NM_001039083	641522	0.99727	0.819856	0.68438
ARL2	3290739	NM_001667	402	0.922287	0.861896	0.818284
ARL2BP	2570523	NM_012106	23568	1.04003	0.710334	0.854573
ARL3	7150671	NM_004311	403	0.714208	0.974257	1.08888
ARL4A	1410113	NM_005738	10124	4.35152	2.86336	1.53689
ARL4A	1010161	NM_001037164	10124	2.00044	1.93809	0.598987
ARL4A	6290369	NM_001037164	10124	1.66372	0.953017	1.08505
ARL4A	7560615	NM_001037164	10124	1.40354	0.703221	0.939146
ARL4A	1260364	NM_001037164	10124	1.26022	1.02763	0.9266
ARL4C	1300192	NM_005737	10123	1.02534	1.14346	0.645324
ARL4D	4780010	NM_001661	379	1.12752	1.2722	0.813175
ARL5A	70364	NM_012097	26225	2.44083	2.43824	0.907152
ARL5A	6270195	NM_001037174	26225	1.10115	0.570524	0.83868
ARL5A	2630209	NM_001037174	26225	0.896939	0.907064	1.04746
ARL5B	1710753	NM_178815	221079	1.02971	1.38249	0.988944
ARL5B	2340564	NM_178815	221079	0.926413	0.797097	1.17895
ARL6	1090482	NM_032146	84100	1.53434	0.943137	1.01693
ARL6	5270646	NM_177976	84100	1.15748	1.2015	0.923043
ARL6IP1	2690047	NM_015161	23204	1.31568	1.1245	1
ARL6IP1	5960324	NM_015161	23204	0.973446	0.665887	0.927928
ARL6IP4	2350192	NM_018694	51329	1.07739	1.40659	0.770577
ARL6IP4	3120289	NM_001002252	51329	1.01239	1.08947	1.39976
ARL6IP4	4900053	NM_001002251	51329	0.776038	0.961118	0.631609
ARL6IP5	2070563	NM_006407	10550	0.818419	1.39683	1.34668
ARL6IP6	670382	NM_152522	151188	1.8759	2.38635	1.22433
ARL8A	1190768	NM_138795	127829	1.04241	0.886234	1.00301
ARL8B	130685	NM_018184	55207	0.768077	0.603136	0.96178
ARL9	6350066	NM_206919	132946	0.566243	0.402039	1.37865
ARMC1	7570209	NM_018120	55156	0.75116	0.766451	0.945963
ARMC10	6840593	NM_031905	83787	1.47024	1.54447	0.882675
ARMC10	2900372	NM_031905	83787	1.16243	1.3319	0.908492
ARMC2	1710152	NM_032131	84071	1.00377	0.574676	0.333915
ARMC2	6130324	NM_032131	84071	0.635967	0.745747	0.870211
ARMC4	4200274	NM_018076	55130	1.17247	1.07114	0.390231
ARMC5	2060154	NM_024742	79798	0.490402	0.602081	0.577868
ARMC6	2060128	NM_033415	93436	0.682196	1.02206	0.670169
ARMC7	730020	NM_024585	79637	0.555466	0.819338	0.765392
ARMC8	6550750	NM_014154	25852	1.83985	0.938805	0.907897
ARMC8	2510575	NM_015396	25852	1.77238	1.64275	1.16515
ARMC8	940736	NM_015396	25852	1.04521	1.26734	1.15511
ARMC8	6110369	NM_213654	25852	0.660854	0.57252	0.897398
ARMC9	4880619	NM_025139	80210	0.779711	1.16566	1.06107
ARMCX1	4230451	NM_016608	51309	1.07913	0.932525	1.26505
ARMCX2	3930201	NM_177949	9823	0.726698	1.07065	1.86433
ARMCX3	7150427	NM_177947	51566	3.51468	2.60407	1.37635
ARMCX3	2320647	NM_177947	51566	1.70215	2.30673	1.30918
ARMCX3	6180725	NM_177948	51566	1.02264	0.709168	1.53174
ARMCX3	3780753	NM_177948	51566	0.63606	0.676592	1.55216
ARMCX5	1580619	NM_022838	64860	0.900896	1.36861	0.963814
ARMCX6	4490215	NM_019007	54470	2.59368	3.75676	1.36817
ARMCX6	4150020	NM_019007	54470	2.01211	2.6377	1.23266
ARMCX6	1690475	NM_019007	54470	1.22563	1.72308	1.15937
ARNT	2640338	NM_001668	405	0.940555	0.904496	1.31997
ARNT2	4180307	NM_014862	9915	1.08734	1.11994	0.934159
ARNTL	20064	NM_001030273	406	1.22952	1.20366	0.879275
ARNTL	7150519	NM_001030272	406	0.752939	0.548872	0.813249
ARNTL2	770523	NM_020183	56938	0.99504	0.713146	0.821662
ARPC1A	7610692	NM_006409	10552	0.88105	1.20357	0.802493
ARPC1B	130717	NM_005720	10095	3.53167	4.29862	0.71673
ARPC2	7560162	NM_005731	10109	0.993084	0.638417	1.49537
ARPC2	7160327	NM_005731	10109	0.908124	0.6802	0.933998
ARPC2	5340546	NM_152862	10109	0.790591	1.2423	1.30757
ARPC3	7380193	NM_005719	10094	1.19061	1.34732	0.835781
ARPC4	2600619	NM_001024960	10093	4.539	5.27401	0.714454
ARPC4	2690601	NM_001024959	10093	1.61241	1.90185	0.986134
ARPC4	2230068	NM_005718	10093	0.970997	1.40745	0.818982
ARPC5	20142	NM_005717	10092	0.815836	0.597245	0.785691
ARPC5L	4830056	NM_030978	81873	0.783187	0.472662	0.69183
ARPM1	2480615	NM_032487	84517	1.12527	0.646005	0.809241
ARPP19	6620356	NM_006628	10776	0.930466	0.665494	0.851951
ARPP19	2140368	NM_006628	10776	0.910937	1.84262	1.11388
ARPP21	1690561	NM_016300	10777	1.39129	1.05233	1.22374
ARPP21	7210554	NM_016300	10777	1.08958	1.1732	0.734743
ARPP21	4560301	NM_016300	10777	1.04321	0.880906	0.458343
ARPP21	7160437	NM_001025068	10777	0.982734	1.41417	0.986778
ARPP21	6370551	NM_198399	10777	0.921659	1.20376	0.895434
ARR3	3850307	NM_004312	407	0.694863	0.612558	2.01286
ARRB1	2490288	NM_020251	408	0.704667	0.520571	0.750431
ARRB1	5670673	NM_004041	408	0.664686	0.575216	0.739994
ARRB2	4260347	NM_199004	409	1.66448	3.43378	1.48937
ARRB2	3930133	NM_199004	409	0.954464	0.798578	1.53322
ARRDC1	4850646	NM_152285	92714	1.24832	1.95689	0.394689
ARRDC2	3870504	NM_015683	27106	1.15869	0.95312	1.23407
ARRDC2	7000609	NM_015683	27106	0.976198	1.40312	1.15111
ARRDC3	4060672	NM_020801	57561	1.49416	2.07439	1.57515
ARRDC3	6450161	NM_020801	57561	1.07173	1.07041	1.13496
ARRDC4	6580168	NM_183376	91947	1.62894	1.23879	1.22828
ARRDC4	3450463	NM_183376	91947	1.11531	0.785949	2.23763
ARRDC5	2370270	NM_001080523	645432	1.34441	2.02218	0.579173
ARSA	4150168	NM_000487	410	1.62644	1.89002	1.03595
ARSA	4920546	NM_001085425	410	1.24555	2.14093	1.12074
ARSB	7040600	NM_000046	411	1.7139	1.47667	0.594074
ARSB	150546	NM_198709	411	1.39507	1.43403	0.894677
ARSB	6900309	NM_000046	411	0.869175	0.716587	0.857299
ARSB	270215	NM_000046	411	0.825562	0.389734	0.507013
ARSD	4230609	NM_001669	414	1.43841	1.09118	1.19391
ARSD	4540672	NM_009589	414	1.009	1.08287	1.90957
ARSD	6580689	NM_001669	414	0.585415	0.968376	0.787942
ARSF	4390403	NM_004042	416	1.51646	1.84717	0.752458
ARSG	3190753	NM_014960	22901	1.27277	1.16294	0.775633
ARSI	4230161	NM_001012301	340075	1.08913	0.93169	0.604809
ARSJ	2640725	NM_024590	79642	1.01222	0.994234	1.03322
ARSK	7560255	NM_198150	153642	0.974709	1.15809	0.959187
ART1	3710114	NM_004314	417	1.64416	1.67096	1.16423
ART3	7040497	NM_001179	419	0.710896	1.03442	0.730694
ART4	1400577	NM_021071	420	1.04961	1.0209	0.698087
ARTN	6560494	NM_057091	9048	1.89057	2.62308	0.704372
ARTN	1850246	NM_057091	9048	0.900823	1.04538	1.5211
ARV1	1500246	NM_022786	64801	1.07937	1.16472	0.914775
ARVCF	5810301	NM_001670	421	0.982249	0.737214	0.883648
AS3MT	4280390	NM_020682	57412	0.741816	1.0762	0.859347
ASAH1	2030482	NM_177924	427	1.33112	0.966759	1.00632
ASAH1	5420332	NM_004315	427	1.31201	1.25775	0.802811
ASAH2	1190112	NM_019893	56624	1.59565	1.18244	0.735773
ASAH2B	4810537	NM_001079516	653308	0.781516	1.09611	1.04916
ASAH2B	2370731	NM_001079516	653308	0.780325	1.01202	1.40267
ASAP1	940164	NM_018482	50807	1.70508	2.3337	0.918511
ASAP1	7000072	NM_018482	50807	1.44136	0.793661	1.43583
ASAP2	2030041	NM_003887	8853	0.851889	0.668615	0.827543
ASAP3	2190709	NM_017707	55616	1.28596	1.0806	0.529111
ASB11	6510369	NM_080873	140456	1.10014	1.35896	0.679085
ASB11	4640152	NM_001012428	140456	0.941254	0.853463	0.598619
ASB12	7160519	NM_130388	142689	0.93506	0.90151	0.891523
ASB13	5050575	NM_024701	79754	0.659092	0.571722	0.627756
ASB14	2850047	NM_130387	142686	1.66004	1.18941	0.841989
ASB17	1580523	NM_080868	127247	0.873332	0.841264	1.33038
ASB3	5720458	NM_016115	51130	2.90263	3.06029	1.15478
ASB3	2690068	NM_145863	51130	1.17626	1.54823	1.46082
ASB3	60309	NM_145863	51130	1.15377	1.64976	1.70953
ASB4	2320014	NM_016116	51666	1.03116	1.00833	0.476329
ASB4	1170382	NM_145872	51666	0.956077	0.896347	0.702858
ASB5	1440445	NM_080874	140458	1.19826	0.952834	1.89042
ASB6	870164	NM_017873	140459	1.39071	1.20585	0.740104
ASB6	1780450	NM_177999	140459	0.676973	0.853054	0.846616
ASB6	7000333	NM_177999	140459	0.608395	0.705291	1.38358
ASB7	1470528	NM_024708	140460	1.09635	1.29098	1.21743
ASB7	2190156	NM_198243	140460	1.06873	1.16375	0.959014
ASB7	2190528	NM_024708	140460	0.797541	0.716257	0.744943
ASB8	870451	NM_024095	140461	1.17279	0.677972	0.90295
ASB8	2490441	NM_024095	140461	1.12281	1.8264	1.26627
ASB9	130110	NM_024087	140462	0.944305	0.932627	0.950787
ASB9	4480091	NM_024087	140462	0.934472	0.771557	0.722494
ASCC1	830528	NM_015947	51008	0.9181	0.768574	1.08321
ASCC2	1570523	NM_032204	84164	0.836983	0.953187	1.17289
ASCC3	5490138	NM_006828	10973	1.19904	1.05764	3.04054
ASCC3	650722	NM_006828	10973	1.14448	0.650036	0.713107
ASCC3	870040	NM_006828	10973	1.1232	0.62223	0.812298
ASCL1	4830376	NM_004316	429	0.906847	1.0447	0.719168
ASCL2	7200435	NM_005170	430	7.57219	0.215001	2.37136
ASCL4	540437	NM_203436	121549	0.83166	1.08384	1.2924
ASF1A	7560048	NM_014034	25842	0.942019	1.25747	0.824378
ASF1B	2630673	NM_018154	55723	0.565804	0.832411	0.805475
ASGR1	2370064	NM_001671	432	1.85529	0.339386	1.68008
ASGR2	3800576	NM_080914	433	1.55216	1.77313	1.01742
ASGR2	4860753	NM_080914	433	1.31506	2.05264	1.03741
ASGR2	1030386	NM_080912	433	0.904862	0.952913	1.16924
ASH1L	4810239	NM_018489	55870	0.704586	0.771886	0.891823
ASH2L	3440348	NM_004674	9070	1.14755	1.57701	0.8667
ASIP	3460474	NM_001672	434	1.03054	0.980726	1.95372
ASL	1690128	NM_000048	435	1.12268	0.752472	2.45737
ASL	4850681	NM_001024944	435	0.997088	0.729082	1.06365
ASL	6620598	NM_001024943	435	0.748849	0.728759	0.877911
ASMT	6220546	NM_004043	438	0.617024	0.681627	2.11927
ASMTL	430376	NM_004192	8623	1.3093	2.21128	1.49115
ASMTL	6760619	NM_004192	8623	1.3091	1.77685	1.50738
ASNA1	4480435	NM_004317	439	0.478797	0.591315	0.759359
ASNS	1510296	NM_133436	440	0.946725	1.0199	2.1318
ASNS	5960181	NM_133436	440	0.794839	0.509109	3.46296
ASNSD1	6960242	NM_019048	54529	0.895615	0.896141	0.946244
ASPH	2370450	NM_032468	444	1.31264	1.33749	1.51033
ASPH	5890619	NM_004318	444	1.25788	0.933903	1.2665
ASPH	6100746	NM_004318	444	1.11556	1.28714	1.17417
ASPHD1	6420561	NM_181718	253982	1.26038	1.83322	1.2765
ASPHD2	7400102	NM_020437	57168	0.942999	0.834385	1.06451
ASPM	6130441	NM_018136	259266	0.905919	0.872656	0.954605
ASPRV1	4860255	NM_152792	151516	0.922197	0.834047	1.12176
ASPSCR1	6940484	NM_024083	79058	0.955398	0.444342	0.954403
ASRGL1	6770270	NM_025080	80150	0.894241	0.664285	0.534296
ASS1	110433	NM_000050	445	1.12068	1.35963	1.70077
ASS1	2640544	NM_054012	445	0.942853	1.5022	1.48523
ASS1	4900370	NM_000050	445	0.910977	0.691418	1.09909
ASTE1	6650026	NM_014065	28990	0.617103	0.417656	0.747245
ASTL	6400070	NM_001002036	431705	1.16927	1.27319	1.01771
ASTN1	1990333	NM_004319	460	1.30724	1.30776	0.80777
ASTN2	3120132	NM_198188	23245	2.11373	1.04803	1.06908
ASXL1	5390180	NM_015338	171023	0.791017	1.06244	0.98377
ASXL2	650075	NM_018263	55252	1.43318	1.24161	0.811502
ASZ1	1510431	NM_130768	136991	1.02181	0.853454	1.78361
ATAD1	5260221	NM_032810	84896	1.00105	1.08117	0.917315
ATAD1	5340551	NM_032810	84896	0.832319	0.616716	0.974424
ATAD2	1410242	NM_014109	29028	1.12691	1.43789	1.04287
ATAD3A	4150086	NM_018188	55210	0.560149	0.708899	0.703635
ATAD3B	7330091	NM_031921	83858	1.90576	1.78066	0.558696
ATAD3C	540296	NM_001039211	219293	1.17889	1.04292	0.996309
ATAD5	2120592	NM_024857	79915	0.645868	0.934559	0.992184
ATAT1	6130471	NM_024909	79969	0.855053	1.11912	0.984585
ATAT1	6100326	NM_024909	79969	0.656795	0.909838	1.0669
ATAT1	2710538	NM_001031722	79969	0.579707	1.18419	0.456755
ATCAY	7050577	NM_033064	85300	1.3944	1.10367	1.48995
ATE1	4150626	NM_007041	11101	1.2895	1.07129	0.665403
ATE1	460731	NM_001001976	11101	1.20236	1.1073	1.03574
ATE1	6770243	NM_007041	11101	1.02915	0.707397	0.950677
ATE1	3520427	NM_007041	11101	0.901112	0.609116	0.908094
ATF1	7200575	NM_005171	466	1.28749	1.165	1.12846
ATF2	2100735	NM_001880	1386	1.32376	1.9722	1.09504
ATF3	4780128	NM_001040619	467	1.51712	0.705003	1.61249
ATF3	6380735	NM_001030287	467	0.802716	0.96973	1.27227
ATF3	6560575	NM_001040619	467	0.762111	0.800361	0.841083
ATF4	6480053	NM_001675	468	1.84018	1.6729	0.831022
ATF4	3460309	NM_001675	468	1.02539	0.501126	1.23843
ATF4	7610187	NM_182810	468	0.996889	1.43539	1.25874
ATF5	1570484	NM_012068	22809	0.987282	0.694686	1.3299
ATF6	5420343	NM_007348	22926	0.728915	0.866194	0.875457
ATF6B	3940348	NM_004381	1388	0.9438	1.2565	1.11931
ATF7	1500400	NM_006856	11016	0.758166	0.847297	0.765057
ATF7IP	2570682	NM_018179	55729	0.921863	0.857923	1.07739
ATF7IP2	2480075	NM_024997	80063	1.08702	0.764373	1.71401
ATG10	20050	NM_031482	83734	0.96454	0.773032	0.863385
ATG10	5340603	NM_031482	83734	0.949994	1.08489	0.811975
ATG12	1410348	NM_004707	9140	1.13787	1.50489	1.83434
ATG12	5720142	NM_004707	9140	0.828119	1.5024	1.01337
ATG13	6620079	NM_014741	9776	0.773798	0.934623	0.519042
ATG14	4560154	NM_014924	22863	0.921019	1.14394	1.02399
ATG16L1	3420347	NM_017974	55054	0.728555	0.741847	0.746024
ATG16L1	2760491	NM_030803	55054	0.471043	0.455815	0.702855
ATG16L2	2000307	NM_033388	89849	0.584006	1.07423	1.22207
ATG2A	4200008	NM_015104	23130	0.787921	0.909988	0.825164
ATG2B	4780762	NM_018036	55102	1.14719	0.872265	0.811193
ATG3	1690253	NM_022488	64422	1.09422	1.09795	0.928142
ATG3	830035	NM_022488	64422	1.03667	1.2622	0.800533
ATG4A	620168	NM_178270	115201	0.796384	0.835679	0.66392
ATG4B	2060136	NM_178326	23192	5.72739	3.54867	0.879666
ATG4C	5090291	NM_032852	84938	1.19903	1.2462	1.43639
ATG4C	2970528	NM_032852	84938	1.0891	0.81219	1.85955
ATG4D	730767	NM_032885	84971	1.02924	0.870936	0.760659
ATG4D	1450647	NM_032885	84971	0.8799	1.52915	0.983729
ATG5	2030228	NM_004849	9474	0.831673	0.833516	0.72087
ATG7	5220754	NM_006395	10533	0.728081	0.726557	0.646103
ATG9A	3190326	NM_001077198	79065	1.33367	1.10547	0.702404
ATG9A	3890528	NM_001077198	79065	1.12976	1.01787	1.31676
ATG9B	2570204	NM_173681	285973	3.26193	1.19398	1.14738
ATIC	1770546	NM_004044	471	0.629477	0.339263	0.661889
ATL1	430372	NM_015915	51062	0.825989	1.32328	1.45319
ATL1	5490528	NM_181598	51062	0.593381	1.79208	1.31707
ATL2	2850494	NM_022374	64225	1.40162	1.49021	0.899078
ATL3	1240243	NM_015459	25923	0.791438	0.594889	1.04983
ATM	6840605	NM_000051	472	1.18618	1.4412	1.06694
ATM	4250008	NM_000051	472	1.11198	1.78784	1.52631
ATM	580537	NM_000051	472	0.803702	0.832078	1.02461
ATMIN	6620600	NM_015251	23300	0.743788	0.498549	0.668994
ATMIN	1050180	NM_015251	23300	0.580588	0.456877	0.352733
ATN1	4220754	NM_001940	1822	1.18852	2.19855	0.996869
ATN1	4390543	NM_001007026	1822	0.601716	0.575197	1.02988
ATOH1	6660129	NM_005172	474	1.23039	0.828388	0.967359
ATOH7	5690092	NM_145178	220202	1.51358	1.59261	0.606222
ATOH7	4480047	NM_145178	220202	0.764823	0.698497	0.977819
ATOH8	3840376	NM_032827	84913	0.95978	1.10585	1.01853
ATOX1	5560131	NM_004045	475	0.681161	0.876528	0.674434
ATP10A	1580717	NM_024490	57194	1.04779	0.92694	1.48941
ATP10B	4730180	NM_025153	23120	0.984096	1.2611	1.15126
ATP10D	5490681	NM_020453	57205	1.31893	0.982185	0.556337
ATP11A	1170139	NM_015205	23250	0.839444	0.683107	0.936657
ATP11A	6980551	NM_032189	23250	0.722302	0.878674	2.57838
ATP11B	6060706	NM_014616	23200	0.877682	1.03158	0.809469
ATP11B	6650594	NM_014616	23200	0.76276	0.767289	0.996344
ATP11C	430332	NM_173694	286410	0.903062	0.884866	0.478165
ATP11C	2940551	NM_001010986	286410	0.746129	0.590319	0.72709
ATP11C	6040204	NM_173694	286410	0.621859	0.38727	0.707456
ATP12A	1820414	NM_001676	479	0.772692	1.26529	0.821422
ATP13A1	2060193	NM_020410	57130	0.550238	0.562545	0.922238
ATP13A2	7100326	NM_022089	23400	0.679219	0.716272	0.665525
ATP13A5	1770053	NM_198505	344905	1.01173	1.07205	1.11591
ATP1A1	5570152	NM_000701	476	1.83647	1.32422	0.637496
ATP1A1	3370164	NM_000701	476	0.778349	0.973722	0.851938
ATP1A3	770338	NM_152296	478	1.01432	1.0585	1.33631
ATP1A4	5550274	NM_001001734	480	0.797843	0.711465	0.784823
ATP1B1	6060482	NM_001677	481	1.53645	2.42621	0.834271
ATP1B1	4180452	NM_001677	481	0.943188	2.2573	0.606036
ATP1B3	3130092	NM_001679	483	4.05611	3.42017	0.656424
ATP1B4	6100706	NM_012069	23439	1.59235	0.998745	0.882371
ATP2A1	5490360	NM_173201	487	0.817566	1.0105	1.26509
ATP2A2	770079	NM_170665	488	2.37386	0.815772	0.777164
ATP2A2	5810189	NM_170665	488	0.898988	0.782046	1.00488
ATP2A2	1940053	NM_001681	488	0.810336	0.734021	1.00574
ATP2A3	1110678	NM_174955	489	1.10659	0.588212	0.971091
ATP2A3	3290747	NM_174955	489	0.882776	1.03974	0.806153
ATP2B1	6510164	NM_001682	490	1.02061	0.797774	0.625978
ATP2B1	6180059	NM_001001323	490	0.94035	0.911625	0.901169
ATP2B1	4230564	NM_001001323	490	0.879868	0.671635	0.896514
ATP2B2	540338	NM_001001331	491	1.32714	1.4082	0.726035
ATP2B2	3520193	NM_001683	491	0.751787	1.31282	2.12167
ATP2B2	70435	NM_001001331	491	0.74135	1.01646	1.77023
ATP2B4	4180369	NM_001001396	493	1.23746	0.805212	0.976866
ATP2B4	6100482	NM_001001396	493	0.877355	0.6313	1.33588
ATP2B4	6900630	NM_001684	493	0.74988	1.04257	1.40806
ATP2C1	5080228	NM_001001486	27032	4.43488	2.12413	1.58258
ATP2C1	3290279	NM_001001485	27032	1.69033	1.20897	1.0558
ATP2C1	780367	NM_014382	27032	0.973695	0.486365	0.879794
ATP2C2	2510669	NM_014861	9914	1.09394	0.68108	0.698362
ATP4A	5270040	NM_000704	495	1.27699	1.01087	1.12043
ATP5A1	940711	NM_004046	498	0.852842	0.692265	0.833312
ATP5A1	6110674	NM_004046	498	0.739009	0.641276	0.938247
ATP5B	4540021	NM_001686	506	0.675812	0.528486	0.89673
ATP5C1	4780450	NM_005174	509	1.57457	0.946905	1.01987
ATP5D	3190671	NM_001687	513	1.17943	1.61006	0.881952
ATP5D	1110377	NM_001687	513	0.637574	1.318	0.809679
ATP5EP2	6900324	NR_002162	432369	0.908345	0.768234	0.90653
ATP5EP2	5090561	NR_002162	432369	0.836936	0.818743	0.799756
ATP5F1	1010598	NM_001688	515	2.4383	1.91341	1.05955
ATP5F1	4060326	NM_001688	515	0.996919	1.24714	0.83319
ATP5G1	460040	NM_005175	516	0.720673	0.585619	1.70208
ATP5G1	5870446	NM_001002027	516	0.666642	0.813384	0.651543
ATP5G2	3190711	NM_005176	517	1.37124	1.99487	1.29456
ATP5G2	7330612	NM_005176	517	1.02776	1.37415	1.17374
ATP5G2	2320762	NM_001002031	517	0.91138	1.04713	0.949055
ATP5G3	6220541	NM_001002258	518	0.949474	0.779301	0.629418
ATP5H	4290300	NM_006356	10476	0.83524	0.954509	0.754753
ATP5H	3450743	NM_001003785	10476	0.783863	0.557522	0.76307
ATP5I	4560246	NM_007100	521	1.06108	0.66682	1.01259
ATP5I	1580603	NM_007100	521	0.759914	0.813283	0.748372
ATP5J	5860162	NM_001003701	522	0.989527	1.15504	0.975172
ATP5J	6560180	NM_001003696	522	0.881704	1.12028	1.09408
ATP5J2	6590593	NM_004889	9551	0.801704	0.603863	0.637745
ATP5J2	4760112	NM_001003714	9551	0.76108	0.597511	0.77281
ATP5L	6370411	NM_006476	10632	0.894847	1.00798	1.02501
ATP5L	4070544	NM_006476	10632	0.838473	0.671337	0.882266
ATP5O	6110754	NM_001697	539	1.10894	0.607465	0.868097
ATP5S	5560053	NM_001003805	27109	1.56293	1.09977	0.973942
ATP5S	2120100	NM_001003803	27109	1.35904	1.03625	0.963067
ATP5S	6900722	NM_015684	27109	1.0811	0.797312	0.911732
ATP5SL	1990274	NM_018035	55101	0.636333	0.665317	0.923652
ATP6AP1	6590201	NM_001183	537	0.927522	0.708401	1.22627
ATP6AP1L	5490270	NM_001017971	92270	0.960114	2.15099	1.28709
ATP6AP2	7560097	NM_005765	10159	0.918157	0.941816	1.04115
ATP6V0A1	1660215	NM_005177	535	1.50931	0.789996	1.76409
ATP6V0A2	620092	NM_012463	23545	1.35317	1.49379	0.966082
ATP6V0A4	4810731	NM_130841	50617	1.30807	1.19794	0.922071
ATP6V0A4	2100097	NM_020632	50617	1.2367	0.949101	1.7715
ATP6V0A4	5290243	NM_020632	50617	0.680077	0.838038	1.0821
ATP6V0B	7400673	NM_001039457	533	0.81307	0.377261	0.717789
ATP6V0B	7160059	NM_004047	533	0.654629	0.347644	0.662521
ATP6V0D1	6330377	NM_004691	9114	1.11544	1.1837	0.776292
ATP6V0D2	1980706	NM_152565	245972	1.02548	1.13052	1.8318
ATP6V0E1	2320110	NM_003945	8992	1.60692	2.38923	0.970661
ATP6V0E1	4730343	NM_003945	8992	1.03183	1.22821	1.03919
ATP6V0E2	6180088	NM_145230	155066	0.734143	0.352774	0.618648
ATP6V1A	7050131	NM_001690	523	0.948146	0.536118	0.990423
ATP6V1B2	6650017	NM_001693	526	0.836487	0.912137	1.11457
ATP6V1C1	5550750	NM_001695	528	1.96361	1.30841	1.16486
ATP6V1C1	2480241	NM_001695	528	0.604542	0.472078	1.06248
ATP6V1C2	10070	NM_144583	245973	0.493482	0.83604	0.94464
ATP6V1D	1660736	NM_015994	51382	0.946907	1.13939	1.00979
ATP6V1E1	5890450	NM_001039367	529	0.897816	1.11429	0.997772
ATP6V1E1	6860543	NM_001039367	529	0.886252	1.21058	1.03367
ATP6V1E2	4010477	NM_080653	90423	0.630673	0.418112	1.28665
ATP6V1F	3870630	NM_004231	9296	0.94268	1.1625	1.06319
ATP6V1G1	6370091	NM_004888	9550	0.985089	1.29908	0.990624
ATP6V1G2	1260538	NM_130463	534	1.09757	1.50404	1.17394
ATP6V1G3	5960162	NM_133262	127124	1.27543	1.04994	0.928343
ATP6V1H	5390546	NM_213620	51606	1.29329	1.11752	1.6149
ATP6V1H	6330279	NM_213619	51606	0.598205	0.644911	1.05894
ATP7A	6280414	NM_000052	538	1.0194	1.13646	1.29615
ATP7B	7510259	NM_000053	540	1.50668	0.733604	1.21632
ATP7B	1230601	NM_000053	540	0.938105	1.08753	0.550434
ATP8A1	520634	NM_006095	10396	0.875285	0.883153	1.29722
ATP8A2	4590577	NM_016529	51761	0.96467	1.147	0.663862
ATP8B2	4490446	NM_001005855	57198	1.11236	0.862193	0.541161
ATP8B2	6960168	NM_020452	57198	0.757397	0.43375	1.00259
ATP8B2	3310121	NM_020452	57198	0.704203	0.769471	0.587443
ATP8B3	6380102	NM_138813	148229	9.32886	6.95482	1.86233
ATP8B4	1820270	NM_024837	79895	0.387023	0.371174	0.942239
ATP9A	5860603	NM_006045	10079	1.29299	1.17402	1.70177
ATP9A	2510156	NM_006045	10079	0.997438	0.847675	1.37375
ATP9A	6480630	NM_006045	10079	0.331106	0.265511	0.810904
ATP9B	2120209	NM_198531	374868	0.665364	0.637205	0.858895
ATPAF1	4890491	NM_022745	64756	0.948261	1.18173	0.749349
ATPAF1	5810673	NM_001042546	64756	0.673946	0.867151	0.939313
ATPAF2	3780239	NM_145691	91647	0.817344	0.73101	1.24927
ATPBD4	4180059	NM_080650	89978	0.840329	1.02797	1.15397
ATPBD4	2710520	NM_080650	89978	0.798195	0.574317	0.68796
ATPIF1	1070025	NM_178191	93974	1.40805	1.51819	1.06703
ATPIF1	3780068	NM_178191	93974	0.818523	0.851189	0.935545
ATR	670358	NM_001184	545	0.910945	0.725494	0.68107
ATRIP	4860367	NM_032166	84126	0.59985	0.748755	0.517618
ATRIP	7210438	NM_032166	84126	0.546698	0.669037	0.655876
ATRN	6520243	NM_139321	8455	1.1403	0.736118	1.03582
ATRN	7100167	NM_139321	8455	1.01675	0.970232	0.534142
ATRN	4570196	NM_139321	8455	0.942228	0.958316	0.633307
ATRN	2320433	NM_139321	8455	0.80037	0.817709	1.25902
ATRN	1710494	NM_139322	8455	0.736993	0.779584	1.25782
ATRX	2340600	NM_000489	546	1.15693	0.870549	0.873348
ATXN1	5080154	NM_000332	6310	0.815218	0.692009	1.48384
ATXN1	520601	NM_000332	6310	0.672846	0.707297	1.11881
ATXN10	6180014	NM_013236	25814	0.660469	0.573333	0.649864
ATXN10	6550181	NM_013236	25814	0.618612	0.585186	0.766227
ATXN2	1090400	NM_002973	6311	1.00094	0.925268	1.12376
ATXN2L	4760102	NM_007245	11273	1.17374	1.17046	1.38407
ATXN3	2630446	NM_004993	4287	1.98195	1.25826	1.4673
ATXN3	510747	NM_030660	4287	1.73143	2.43212	1.27484
ATXN7	4280576	NM_000333	6314	1.62596	1.26616	0.762404
ATXN7L1	2350615	NM_152749	222255	0.632135	0.821169	1.39901
ATXN7L2	2710187	NM_153340	127002	0.684107	0.992551	0.668405
ATXN7L3	6220093	NM_001098833	56970	1.2369	1.58961	0.851616
AUH	7330180	NM_001698	549	1.31239	1.59767	1.34634
AUP1	6290053	NM_181575	550	1.00557	1.58394	0.873053
AURKA	5420309	NM_198434	6790	1.16968	1.01049	1.0961
AURKA	4730605	NM_198436	6790	1.13003	0.959022	1.17325
AURKAIP1	5810088	NM_017900	54998	0.835377	0.275004	0.859323
AURKB	6770026	NM_004217	9212	0.94946	1.41263	1.00171
AURKC	5890634	NM_001015879	6795	0.935239	0.840409	0.902627
AUTS2	1470762	NM_015570	26053	0.561551	0.486093	1.24509
AVEN	3800634	NM_020371	57099	0.810163	0.495055	0.514781
AVIL	4390369	NM_006576	10677	0.790341	0.697111	0.773638
AVL9	5700112	NM_015060	23080	1.00503	0.634499	1.52373
AVP	5690253	NM_000490	551	0.765248	1.58236	1.12677
AVP	580397	NM_000490	551	0.442438	1.16601	1.92185
AVPI1	990500	NM_021732	60370	1.68842	2.11937	1.36847
AVPR1A	5220176	NM_000706	552	0.717046	0.844016	0.683641
AVPR1B	6280376	NM_000707	553	1.28855	1.74066	1.33317
AWAT2	6590747	NM_001002254	158835	0.645408	0.912542	0.856662
AXDND1	380441	NM_144696	126859	0.875457	1.22028	1.30685
AXDND1	5670546	NM_144696	126859	0.64401	0.706958	2.18139
AXIN1	5550398	NM_003502	8312	1.2597	1.39916	1.54473
AXIN1	3460754	NM_181050	8312	0.597125	0.547236	1.11141
AXIN2	1070189	NM_004655	8313	1.02073	0.801984	1.22337
AXL	6480703	NM_021913	558	3.84821	7.19344	1.53085
AXL	4640403	NM_021913	558	2.68184	7.1035	1.76406
AZGP1	7200324	NM_001185	563	0.946518	0.558276	1.14913
AZI1	3390605	NM_014984	22994	0.973376	0.782119	1.00381
AZI1	4180400	NM_014984	22994	0.926233	0.770254	1.54597
AZI2	5490348	NM_022461	64343	0.918511	1.74107	1.6791
AZIN1	3990523	NM_015878	51582	1.59734	1.03485	0.797558
AZIN1	2480039	NM_015878	51582	1.06739	1.25489	0.778208
AZIN1	4070661	NM_148174	51582	1.05982	1.20043	0.837923
AZU1	5670739	NM_001700	566	0.367873	0.424582	1.33608
B2M	4890487	NM_004048	567	1.05623	0.932781	1.20053
B2M	240195	NM_004048	567	0.929231	1.33283	1.13778
B3GALNT1	3940711	NM_033169	8706	1.14087	1.05951	1.15522
B3GALNT1	5490672	NM_033167	8706	0.847452	0.662665	0.994829
B3GALNT1	2970040	NM_033168	8706	0.57094	0.383531	0.855095
B3GALNT2	160376	NM_152490	148789	1.0533	0.846962	1.18649
B3GALT1	3310736	NM_020981	8708	0.809909	0.685015	1.52772
B3GALT2	4590008	NM_003783	8707	0.973945	1.01453	1.14275
B3GALT4	2510161	NM_003782	8705	0.937532	0.897598	1.59913
B3GALT5	150377	NM_033172	10317	1.40599	1.1022	0.686702
B3GALT5	5570452	NM_033173	10317	1.25473	0.780422	1.07341
B3GALT5	1190576	NM_006057	10317	0.896821	0.79531	1.29892
B3GALT6	2510477	NM_080605	126792	0.615294	0.250951	0.66686
B3GALTL	4640673	NM_194318	145173	0.606111	0.661326	1.14652
B3GAT1	6370014	NM_018644	27087	1.23753	1.44646	2.11239
B3GAT1	1260017	NM_054025	27087	1.1472	1.17726	0.957365
B3GAT1	3440343	NM_018644	27087	0.751337	0.74238	0.828672
B3GAT3	7510563	NM_012200	26229	0.578517	0.876625	0.943122
B3GNT1	2260220	NM_006876	11041	1.03652	1.16364	0.90712
B3GNT2	380056	NM_006577	10678	2.86713	3.17805	1.09521
B3GNT3	2100435	NM_014256	10331	0.992954	1.14087	0.859703
B3GNT5	1300722	NM_032047	84002	0.872154	0.537456	0.916519
B3GNT8	1470132	NM_198540	374907	1.01909	1.37544	0.557085
B3GNTL1	1570086	NM_001009905	146712	1.05929	1.27496	1.14201
B4GALNT1	1740086	NM_001478	2583	1.69017	2.38704	0.944339
B4GALNT3	3850022	NM_173593	283358	1.0485	0.760778	1.72212
B4GALNT4	670403	NM_178537	338707	0.873919	1.14229	0.692967
B4GALT1	3460386	NM_001497	2683	0.645339	1.12381	0.711426
B4GALT2	3120487	NM_003780	8704	0.904915	1.12925	0.82022
B4GALT3	1030044	NM_003779	8703	0.970342	0.852775	0.999331
B4GALT4	6220672	NM_003778	8702	1.60237	1.07399	1.08037
B4GALT4	2000646	NM_003778	8702	0.523915	0.491909	1.11665
B4GALT5	2060047	NM_004776	9334	0.731945	0.629833	0.683949
B4GALT6	4010553	NM_004775	9331	0.682705	0.430785	0.595791
B4GALT7	520332	NM_007255	11285	1.15849	0.714892	0.999491
B9D1	6040465	NM_015681	27077	1.76461	1.65102	0.834706
B9D2	4280088	NM_030578	80776	0.855839	1.60669	0.927928
BAALC	4010082	NM_024812	79870	0.612158	1.45566	1.1197
BAALC	270431	NM_001024372	79870	0.360536	0.375821	0.887208
BAAT	1980491	NM_001701	570	1.53762	2.23516	1.78746
BABAM1	2760259	NM_014173	29086	1.20466	2.64571	1.22355
BABAM1	3610768	NM_014173	29086	0.816626	0.953831	0.935224
BACE1	2650414	NM_138972	23621	0.900355	0.577903	0.695649
BACE1	4570390	NM_138971	23621	0.770797	0.725274	0.660005
BACE2	2230731	NM_138992	25825	1.13602	0.860167	1.43911
BACE2	1240201	NM_138991	25825	1.09908	0.761189	1.04896
BACH1	2690743	NM_206866	571	0.775818	0.999177	0.859483
BACH2	4560561	NM_021813	60468	1.01674	1.09586	0.951502
BACH2	3060603	NM_021813	60468	0.997965	0.607616	0.948758
BACH2	7650440	NM_021813	60468	0.800079	0.977605	1.19933
BAD	3520553	NM_032989	572	2.12172	2.03728	0.841181
BAD	5860376	NM_032989	572	1.00107	1.97062	0.671686
BAD	6290544	NM_004322	572	0.978856	0.958254	1.03564
BAG1	2060195	NM_004323	573	0.588436	0.490376	0.789423
BAG3	1340075	NM_004281	9531	1.16881	1.17384	1.27531
BAG4	4230632	NM_004874	9530	1.10698	0.958744	0.980691
BAG4	2850646	NM_004874	9530	0.88673	0.845883	0.909894
BAG5	270730	NM_001015048	9529	2.55999	1.30759	0.994529
BAG5	1740181	NM_001015049	9529	0.673324	0.801294	1.17881
BAG5	6550349	NM_001015048	9529	0.672157	0.556739	0.74351
BAG5	130669	NM_004873	9529	0.671191	0.313258	0.801537
BAG6	4260736	NM_080702	7917	0.877188	3.45717	1.31527
BAG6	5340382	NM_080703	7917	0.814263	1.87895	1.07701
BAGE	2320184	NM_001187	574	0.987499	0.713204	0.779408
BAGE2	4880196	NM_182482	85319	0.957563	0.773878	2.64881
BAGE3	7510528	NM_182481	85318	1.4553	1.19047	1.2243
BAGE4	2940440	NM_181704	85317	0.939333	1.24571	0.978074
BAGE4	380139	NM_181704	85317	0.762381	0.938407	0.900569
BAGE5	7380148	NM_182484	85316	1.05565	0.694081	1.01
BAHD1	2650528	NM_014952	22893	0.775795	0.912704	1.18858
BAI1	6220612	NM_001702	575	1.19778	1.17515	1.07225
BAI2	2370474	NM_001703	576	0.736022	1.09512	0.626982
BAI3	5690301	NM_001704	577	1.54702	1.05629	1.18065
BAIAP2	2680470	NM_006340	10458	1.28312	1.14653	1.33033
BAIAP2	70767	NM_006340	10458	1.19341	1.0146	1.55332
BAIAP2	1030164	NM_017451	10458	0.743592	0.827687	0.651927
BAIAP2L1	5700343	NM_018842	55971	3.90124	2.34013	1.13156
BAIAP2L2	6280605	NM_025045	80115	2.03434	2.58569	1.61444
BAIAP3	780719	NM_003933	8938	1.13079	0.923541	1.11532
BAK1	1850019	NM_001188	578	0.934135	0.772449	0.76265
BANF1	3870136	NM_003860	8815	1.57591	2.51152	0.619264
BANF1	150767	NM_003860	8815	1.01143	1.05529	0.549608
BANF2	1570072	NM_001014977	140836	1.04961	1.3378	2.03087
BANF2	5670373	NM_178477	140836	0.835133	1.175	1.05532
BANK1	4010139	NM_001083907	55024	1.08191	0.998409	1.12938
BANP	3360451	NM_017869	54971	0.895011	1.54845	1.33194
BANP	3780450	NM_079837	54971	0.793423	1.05642	1.28754
BANP	380373	NM_079837	54971	0.75451	0.921316	1.37432
BAP1	4010528	NM_004656	8314	0.623106	1.19404	0.863728
BARD1	5080561	NM_000465	580	0.680196	0.704316	0.659826
BARHL1	2760646	NM_020064	56751	1.0095	0.878785	1.1499
BARX1	6450040	NM_021570	56033	1.22899	1.34855	1.22345
BARX2	6550168	NM_003658	8538	0.728416	0.601682	0.784512
BASP1	2140121	NM_006317	10409	0.848152	0.978109	1.12179
BATF	6220195	NM_006399	10538	0.704053	1.18922	0.927123
BATF2	4730059	NM_138456	116071	0.953775	1.13716	0.618261
BATF3	5900253	NM_018664	55509	0.79725	0.765245	1.01411
BAX	7550110	NM_004324	581	1.44643	1.20596	0.757781
BAX	4490538	NM_138764	581	1.15775	1.36864	0.99719
BAZ1A	940288	NM_182648	11177	0.863728	0.629492	0.601248
BAZ1A	1240097	NM_013448	11177	0.791913	0.678793	0.625942
BAZ2A	2060139	NM_013449	11176	0.850795	1.15458	0.874575
BAZ2B	450075	NM_013450	29994	0.733549	0.901691	1.14473
BBC3	3440364	NM_014417	27113	1.92411	1.69626	0.64811
BBS1	5550554	NM_024649	582	0.725755	2.22515	1.05141
BBS10	3800243	NM_024685	79738	1.06129	0.728777	0.932308
BBS12	5570435	NM_152618	166379	0.705696	0.557111	0.875691
BBS2	1410246	NM_031885	583	1.20694	1.45872	1.26959
BBS2	870671	NM_031885	583	0.999086	0.837814	1.24599
BBS4	2470753	NM_033028	585	0.799708	1.88297	1.46481
BBS5	160743	NM_152384	129880	0.81149	0.912205	1.00547
BBS7	2850092	NM_176824	55212	1.05417	0.827263	1.29807
BBS7	70528	NM_176824	55212	1.00379	1.26304	0.567212
BBS7	70189	NM_018190	55212	0.979836	1.02947	1.05222
BBS7	2230112	NM_176824	55212	0.745267	1.10951	1.36483
BBS9	3840066	NM_198428	27241	1.07311	1.22363	1.2159
BBS9	1690167	NM_001033604	27241	0.800692	1.50454	1.15773
BBX	2370703	NM_020235	56987	0.976282	0.628214	1.33462
BCAM	1260719	NM_005581	4059	1.02677	0.960592	1.17483
BCAM	7320390	NM_005581	4059	0.917503	0.370354	0.870315
BCAN	1090246	NM_198427	63827	1.11573	0.836214	1.0999
BCAP29	10044	NM_001008405	55973	2.10551	1.33679	0.63125
BCAP31	6450138	NM_005745	10134	0.719497	0.391557	0.851595
BCAR1	2710746	NM_014567	9564	1.18982	1.16382	0.473538
BCAR3	4070053	NM_003567	8412	1.23476	0.656568	0.858704
BCAS1	3060343	NM_003657	8537	0.836438	1.05396	0.873891
BCAS2	2680358	NM_005872	10286	1.01654	0.802596	0.688947
BCAS2	7610575	NM_005872	10286	0.800788	0.707613	0.721248
BCAS3	4830687	NM_017679	54828	0.946954	0.917461	1.25733
BCAS4	4290079	NM_017843	55653	0.72999	0.553919	1.27335
BCAS4	5560193	NM_017843	55653	0.541517	0.673611	0.984136
BCAT1	7650524	NM_005504	586	1.84803	2.59225	1.59772
BCAT2	6560497	NM_001190	587	0.800901	1.41299	1.0257
BCCIP	1450386	NM_016567	56647	1.84761	1.57848	0.605252
BCCIP	990598	NM_078468	56647	1.1817	0.503634	0.709406
BCCIP	2940040	NM_016567	56647	0.98236	0.876058	0.580825
BCCIP	5270156	NM_078469	56647	0.638893	0.579478	0.821352
BCDIN3D	7400246	NM_181708	144233	0.85447	0.995495	1.28606
BCHE	2030414	NM_000055	590	0.976793	0.923975	1.61965
BCHE	7400433	NM_000055	590	0.706373	0.951417	1.19768
BCKDHA	2810296	NM_000709	593	1.45732	1.35568	1.84347
BCKDHB	7040204	NM_183050	594	1.21391	1.11757	1.4932
BCKDHB	7400630	NM_000056	594	1.17141	1.00213	0.795492
BCKDHB	2140138	NM_000056	594	0.731751	0.463094	0.851624
BCKDHB	2940292	NM_183050	594	0.701602	0.660371	1.03792
BCKDK	5220347	NM_005881	10295	1.26253	1.07094	1.62947
BCL10	110148	NM_003921	8915	2.34735	2.57795	0.957148
BCL10	1340037	NM_003921	8915	0.717831	0.851605	0.880114
BCL11A	6100364	NM_022893	53335	0.994512	0.809734	1.28142
BCL11A	6580450	NM_022893	53335	0.848666	0.83619	0.932961
BCL11A	3170440	NM_022893	53335	0.558765	0.288889	0.976408
BCL11B	1030296	NM_138576	64919	1.35913	1.226	0.686864
BCL11B	4480228	NM_138576	64919	0.816506	0.958962	1.02387
BCL2	4150201	NM_000633	596	0.822033	0.607277	0.806095
BCL2	3180494	NM_000633	596	0.593918	0.399045	0.900646
BCL2A1	7380477	NM_004049	597	0.984688	1.17287	1.26114
BCL2L1	4290411	NM_138578	598	3.34042	3.31342	0.825035
BCL2L1	670673	NM_138578	598	1.58105	0.749282	0.88487
BCL2L10	1110576	NM_020396	10017	1.44445	1.02522	1.04194
BCL2L11	6110717	NM_006538	10018	1.57004	1.40058	1.15094
BCL2L11	1340139	NM_006538	10018	1.46344	0.946159	0.862602
BCL2L11	4390241	NM_207002	10018	1.08615	0.947563	0.850251
BCL2L12	5290634	NM_001040668	83596	1.53828	2.4742	0.910243
BCL2L12	7550753	NM_001040668	83596	1.22786	0.826657	0.841892
BCL2L12	6420379	NM_001040668	83596	1.10909	1.00221	0.755376
BCL2L13	7200452	NM_015367	23786	0.914672	1.12673	1.29501
BCL2L14	2060273	NM_138723	79370	1.18419	1.10032	1.3384
BCL2L14	1450553	NM_030766	79370	1.16054	0.933826	1.15579
BCL2L15	110747	NM_001010922	440603	0.522283	0.774684	1.38224
BCL2L15	1710575	NM_001010922	440603	0.44678	1.83369	0.863648
BCL2L2	5050156	NM_004050	599	1.35053	1.37443	2.02176
BCL3	6330725	NM_005178	602	0.772981	0.871842	1.45906
BCL6	6280458	NM_001706	604	0.726984	0.782655	1.63359
BCL6B	1260093	NM_181844	255877	2.79869	1.55959	1.74527
BCL7A	2140075	NM_020993	605	1.12482	1.40318	0.913719
BCL7A	3460458	NM_001024808	605	0.840301	0.798134	0.873711
BCL7A	990041	NM_001024808	605	0.557817	0.590011	0.763179
BCL7B	2850360	NM_001707	9275	1.41819	1.60342	0.788224
BCL7C	5260196	NM_004765	9274	1.64124	2.23736	0.836939
BCL9	6400619	NM_004326	607	0.85599	0.744762	0.966207
BCL9L	5960471	NM_182557	283149	0.797033	1.0191	1.28057
BCLAF1	3870634	NM_014739	9774	1.30583	0.946802	0.536482
BCLAF1	6760209	NM_001077440	9774	1.13982	1.16623	0.955609
BCLAF1	3800176	NM_001077440	9774	0.652204	0.355124	0.781134
BCMO1	3890072	NM_017429	53630	0.689803	0.897042	1.18586
BCOR	1770435	NM_017745	54880	1.56848	1.91783	0.752445
BCOR	510576	NM_017745	54880	1.33168	1.35926	1.27023
BCORL1	4070296	NM_021946	63035	1.06365	1.25915	1.0463
BCR	4070270	NM_004327	613	3.26724	7.54582	0.867417
BCR	5900100	NM_021574	613	2.05219	3.3137	1.01605
BCR	5270523	NM_004327	613	1.16121	1.16019	1.70469
BCR	2030110	NM_021574	613	0.677949	1.13545	0.628546
BCR	3180682	NM_004327	613	0.648404	1.75415	0.68673
BCS1L	7100131	NM_001079866	617	0.585069	0.813947	0.607677
BCYRN1	5960411	NR_001568	618	1.13264	1.0141	1.3856
BDH1	5490593	NM_203314	622	0.932247	0.915799	0.835888
BDH1	2490437	NM_203314	622	0.865347	1.01909	1.17619
BDH2	4230398	NM_020139	56898	0.819297	1.05274	0.395657
BDKRB1	6940500	NM_000710	623	0.957892	0.891858	1.45474
BDKRB2	2320719	NM_000623	624	1.53262	1.17463	1.16352
BDNF	6760091	NM_170733	627	1.72998	1.73009	1.8776
BDNF	4880356	NM_001709	627	1.32114	1.49774	0.842923
BDNF	1430671	NM_170731	627	0.913741	0.841313	0.888094
BDNF	3450148	NM_170734	627	0.55344	1.08132	1.15842
BDP1	7570563	NM_018429	55814	1.23006	1.03922	1.02763
BECN1	1690379	NM_003766	8678	1.28768	1.23319	1.32374
BEGAIN	360537	NM_020836	57596	0.968448	1.4748	1.34276
BEND2	3360475	NM_153346	139105	1.08669	1.04334	1.00962
BEND2	4230592	NM_153346	139105	1.03337	0.836892	0.352065
BEND3	2100142	NM_001080450	57673	0.548922	0.60959	0.891346
BEND3	5900047	NM_001080450	57673	0.533704	0.467167	0.462813
BEND4	4260291	NM_207406	389206	1.14131	1.27717	0.943688
BEND4	4920082	NM_207406	389206	0.804337	0.603001	0.777092
BEND5	2140059	NM_024603	79656	6.98579	1.04891	3.05248
BEND6	3520164	NM_152731	221336	0.448895	0.44423	0.76211
BEND7	4390047	NM_152751	222389	1.0352	0.953898	0.961791
BEST3	1770253	NM_152439	144453	1.00578	0.936691	1.49021
BEST3	1070750	NM_032735	84821	0.983762	1.11156	1.45324
BEST3	2680687	NM_152439	144453	0.843431	0.882658	1.8596
BEST4	3370180	NM_153274	266675	1.12589	0.926989	0.665528
BET1	1510746	NM_005868	10282	1.21584	0.887848	1.28515
BET1L	3130672	NM_016526	51272	1.06718	2.08059	0.820632
BEX1	5550634	NM_018476	55859	1.30044	1.73046	1.18824
BEX1	6480468	NM_018476	55859	0.561739	0.290379	0.917982
BEX2	4830674	NM_032621	84707	1.0977	0.952378	1.04395
BEX4	1110615	NM_001080425	56271	2.83855	3.29295	0.97511
BEX5	1450240	NM_001012978	340542	1.10977	1.38076	1.05245
BFAR	610022	NM_016561	51283	0.945909	0.894662	1.2898
BFSP1	2370364	NM_001195	631	1.14233	0.953714	0.699852
BFSP2	2690152	NM_003571	8419	1.89201	1.96103	0.628823
BGLAP	4830356	NM_199173	632	0.688907	1.42307	0.831349
BGN	460767	NM_001711	633	0.940896	0.787501	1.38924
BHLHA15	3800563	NM_177455	168620	0.945196	1.00547	1.10953
BHLHB9	7210546	NM_030639	80823	1.00227	0.978517	1.03237
BHLHE22	7210551	NM_152414	27319	1.23328	1.12701	1.26292
BHLHE40	2640735	NM_003670	8553	2.56429	6.89861	5.02336
BHLHE41	2900220	NM_030762	79365	2.6065	1.1596	1.13717
BHMT	1010463	NM_001713	635	0.966549	0.964884	1.30243
BHMT2	20440	NM_017614	23743	1.00519	1.00979	1.26897
BICD1	60048	NM_001714	636	1.42276	1.02783	0.627842
BICD1	6220767	NM_001003398	636	0.823601	0.826821	1.01333
BICD2	6840064	NM_001003800	23299	1.22959	0.491207	1.09495
BICD2	1410437	NM_001003800	23299	1.11635	0.865942	1.27039
BID	1190022	NM_197967	637	0.910916	0.599687	0.804325
BID	5270136	NM_197966	637	0.74695	1.0191	1.07285
BID	1440037	NM_197966	637	0.692433	0.492844	0.665332
BIK	6280440	NM_001197	638	0.855673	0.670314	0.396861
BIN1	650553	NM_139343	274	0.402776	0.853973	1.82515
BIN1	5130440	NM_139346	274	0.324343	0.457491	1.95193
BIN2	3310343	NM_016293	51411	1.76487	1.64935	2.06441
BIN3	1470291	NM_018688	55909	1.07339	1.2237	1.07178
BIRC2	4920707	NM_001166	329	1.86952	2.0099	1.5579
BIRC3	7210154	NM_001165	330	0.985408	0.750925	0.898439
BIRC3	3060255	NM_182962	330	0.842121	0.991756	1.3658
BIRC3	5080021	NM_001165	330	0.713154	0.932877	1.46075
BIRC5	1230682	NM_001168	332	0.875682	0.622931	0.602462
BIRC5	7550626	NM_001012271	332	0.766341	0.840865	1.2986
BIRC6	20601	NM_016252	57448	1.0348	0.594657	0.992818
BIRC7	3450347	NM_022161	79444	1.33897	0.976703	0.613101
BIRC7	2690441	NM_022161	79444	1.13667	0.737214	1.02008
BIVM	1090367	NM_017693	54841	0.727955	0.544797	0.791014
BIVM	4220270	NM_017693	54841	0.647453	0.54844	0.81272
BLCAP	2690524	NM_006698	10904	0.496505	0.753414	0.869795
BLID	4250441	NM_001001786	414899	1.06167	1.13259	1.32856
BLK	6330471	NM_001715	640	1.10278	1.17715	1.32854
BLM	2450717	NM_000057	641	0.76382	0.757784	0.836952
BLNK	3140100	NM_013314	29760	1.21567	1.1626	0.823942
BLOC1S1	1450377	NM_001487	2647	1.01377	1.81949	0.872204
BLOC1S2	2630743	NM_001001342	282991	1.81158	1.5414	1.03363
BLOC1S2	1300554	NM_173809	282991	0.882525	0.901464	1.4009
BLOC1S3	7610379	NM_212550	388552	1.42198	1.69969	0.837963
BLVRA	2940022	NM_000712	644	0.862638	0.324521	0.809704
BLVRB	6620521	NM_000713	645	2.12619	0.871653	1.25792
BLZF1	6130020	NM_003666	8548	0.9453	1.16822	1.64293
BLZF1	2940541	NM_003666	8548	0.944463	1.25294	1.08624
BMF	7650209	NM_001003943	90427	1.17432	1.60233	1.31657
BMF	110280	NM_033503	90427	1.08732	2.77557	1.92149
BMI1	1090292	NM_005180	648	0.971009	0.64029	0.921842
BMP1	5570324	NM_006129	649	0.716141	0.716991	1.21615
BMP15	3840600	NM_005448	9210	0.99433	0.639417	1.27043
BMP2	4280577	NM_001200	650	0.961001	0.962097	1.16164
BMP2K	670647	NM_017593	55589	1.69051	1.83341	0.849289
BMP2K	7200338	NM_198892	55589	1.45828	1.96789	0.863989
BMP2K	5960368	NM_017593	55589	1.26163	0.562504	0.658552
BMP3	4900397	NM_001201	651	1.06234	1.04708	1.25389
BMP4	5490035	NM_130851	652	0.934049	1.19938	0.455605
BMP4	990075	NM_130851	652	0.827128	0.701521	0.914991
BMP5	2000471	NM_021073	653	1.09957	0.837185	1.03908
BMP6	6980064	NM_001718	654	1.15412	0.983319	1.07316
BMP8B	4570279	NM_001720	656	1.59172	1.49688	0.974826
BMPER	4780082	NM_133468	168667	1.04645	1.02793	0.83133
BMPR1A	3290441	NM_004329	657	1.20842	1.07597	1.03083
BMPR1B	1510349	NM_001203	658	1.00528	0.78047	0.895072
BMPR2	460730	NM_001204	659	0.856297	0.966117	1.41422
BMPR2	6060475	NM_001204	659	0.781556	0.456829	1.13106
BMS1	1190717	NM_014753	9790	0.765399	0.589074	0.982837
BMX	3140487	NM_001721	660	1.3965	0.829923	1.20009
BMX	3140678	NM_001721	660	0.976488	0.759147	1.19661
[truncated: 30,981 more rows]
